# 1 **Great-tailed Grackles (*Quiscalus mexicanus*) as a tolerant** 2 **host of avian malaria parasites**

3 M. Andreína Pacheco<sup>1,\*</sup>, Francisco C. Ferreira<sup>2,3</sup>, Corina J. Logan<sup>4</sup>, Kelsey B. McCune<sup>5</sup>, Maggie  
4 P. MacPherson<sup>5,6</sup>, Sergio Albino Miranda<sup>7</sup>, Diego Santiago-Alarcon<sup>8</sup>, and Ananias A. Escalante<sup>1,\*</sup>

5

6 <sup>1</sup>Biology Department/Institute of Genomics and Evolutionary Medicine (iGEM), Temple  
7 University, Philadelphia, Pennsylvania 19122-1801, USA.

8 <sup>2</sup>Center for Conservation Genomics, Smithsonian Conservation Biology Institute, Washington,  
9 DC, USA.

10 <sup>3</sup>Center for Vector Biology, Rutgers University, New Brunswick, NJ, USA.

11 <sup>4</sup>Max Planck Institute for Evolutionary Anthropology, Leipzig, Germany.

12 <sup>5</sup>University of California, Santa Barbara, Santa Barbara, California, United States of America.

13 <sup>6</sup>Current affiliation: Louisiana State University Museum of Natural Science, Louisiana State  
14 University, Baton Rouge, Louisiana, USA.

15 <sup>7</sup>Red de Biología y Conservación de Vertebrados, Instituto de Ecología, A.C Carretera Antigua a  
16 Coatepec 351, El Haya, C.P. 91073. Xalapa, Veracruz, Mexico.

17 <sup>8</sup>Department of Integrative Biology, University of South Florida, Tampa, Florida, USA.

18 **\*Corresponding authors:**

19 M. Andreína Pacheco: [Maria.Pacheco@temple.edu](mailto:Maria.Pacheco@temple.edu)

20 Ananias A. Escalante: [Ananias.Escalante@temple.edu](mailto:Ananias.Escalante@temple.edu)

21 Biology Department/Institute of Genomics and Evolutionary Medicine (iGEM), Temple  
22 University (SERC - 645), 1925 N. 12th St. Philadelphia, PA 19122-1801, USA.

## 23 **Abstract**

24 Great-tailed Grackles (*Quiscalus mexicanus*) are a social, polygamous bird species whose  
25 populations have rapidly expanded their geographic range across North America over the past  
26 century. Before 1865, Great-tailed Grackles were only documented in Central America, Mexico,  
27 and southern Texas in the USA. Given the rapid northern expansion of this species, it is relevant  
28 to study its role in the dynamics of avian blood parasites. Here, 87 Great-tailed grackles in Arizona  
29 (a population in the new center of the range) were screened for haemosporidian parasites using  
30 microscopy and PCR targeting the parasite mitochondrial cytochrome b gene. Individuals were  
31 caught in the wild from January 2018 until February 2020. Haemosporidian parasite prevalence  
32 was 60.9% (53/87). A high *Plasmodium* prevalence was found (59.8%, 52/87), and one grackle  
33 was infected with *Haemoproteus* (*Parahaemoproteus*) sp. (lineage SIAMEX01). Twenty-one  
34 grackles were infected with *P. cathemerium*, sixteen with *P. homopolare*, four with *P. relictum*  
35 (strain GRW04), and eleven with three different genetic lineages of *Plasmodium* spp. that have  
36 not been characterized to species level (MOLATE01, PHPAT01, and ZEMAC01). Gametocytes  
37 were observed in birds infected with three different *Plasmodium* lineages, revealing that grackles  
38 are competent hosts for some parasite species. This study also suggests that grackles are highly  
39 susceptible and develop chronic infections consistent with parasite tolerance, making them  
40 competent to transmit some generalist haemosporidian lineages. It can be hypothesized that, as the  
41 Great-tailed Grackle expands its geographic range, it may affect local bird communities by  
42 increasing the transmission of local parasites but not introducing new species into the parasite  
43 species pool.

44  
45 **Keywords:** avian haemosporidian, competent host, cytochrome b gene, *Haemoproteus*,  
46 *Plasmodium*

## 47 **Introduction**

48 The Great-tailed Grackle (*Quiscalus mexicanus*) is a sexually dimorphic, gregarious, and  
49 omnivorous passerine belonging to the family Icteridae. These social birds occur in North, Central,  
50 and South America, are polygamous, nest in colonies, and forage on the ground primarily in flocks  
51 from a few pairs to hundreds. They can be found in open and grassy areas with a source of surface  
52 water (e.g., pastures, agricultural areas, livestock feedlots, mangroves, secondary forests, second-  
53 growth scrub) and in urban landscapes (e.g., parks, garbage dumps, campuses) [1]. Such  
54 characteristics have allowed them to expand their geographic distribution by exploiting resources  
55 and habitats in human-modified environments, making them an urban dweller and utilizer species  
56 (*sensu* [2]).

57 The current distribution of the Great-tailed Grackle (henceforth grackles) ranges from the  
58 southern United States (mainly California, Arizona, New Mexico, and Texas) through Mexico and  
59 Central America to Colombia, Peru, and Venezuela [3]. Although this species is generally a short-  
60 distance and partial migrant in the northern parts of its range, it has recently become a permanent  
61 resident in areas where it formerly occurred only in the summer [1]. Indeed, its distribution has  
62 undergone a considerable, rapid, and large-scale expansion across the western United States in the  
63 last century. Grackles currently breed as far east as west Louisiana [4]. As the human population  
64 increased, changing the agricultural landscapes and urban centers of western USA, suitable  
65 habitats for grackles became more abundant and connected. This species was first reported in  
66 Arizona in 1935, where individuals were nesting in 1936 – 1937 before the agricultural boom in  
67 Sonora [5,6]. By 1964, the species became established in several places, and since then, their range  
68 has expanded northward [4].

69 Rapid range shifts can reveal plasticity in species' traits. Such considerable change in the  
70 grackles range has driven studies focused on its systematics and population structure [7-14],  
71 behavior [15-19], reproduction and physiology [20-24], and geographic distribution and expansion  
72 [4,25-30]. However, only a few studies on this species have explored how its gregarious behavior  
73 and geographic expansion might affect local parasite communities and their biogeographical  
74 patterns [31]. Indeed, information on its parasites and pathogens is limited to a handful of studies  
75 on the West Nile Virus [32-35], *Toxoplasma gondii* [36], and hemoparasites [37].

76 Here, a haemosporidian parasite assemblage associated with this bird species in Arizona was  
77 studied as a first step to assessing its role in the parasite transmission dynamics. The potential role  
78 of this avian species as a competent and tolerant host of malaria parasites is also discussed. Avian  
79 haemosporidians are dipteran-borne parasites that belong to the genera *Plasmodium*,  
80 *Haemoproteus*, *Leucocytozoon*, and *Fallisia* [38]. Some of the species belonging to the genus  
81 *Plasmodium* are considered the most pathogenic and may cause malaria in their hosts; among  
82 them, *P. relictum* is globally widespread and has contributed to the extinction of many endemic  
83 species [39,40]. In this study, the haemosporidian parasite species were detected in a grackle  
84 population using microscopy and PCR targeting the parasite mitochondrial cytochrome b gene.  
85 This grackle population is considered one of the most recent in the middle of the northern  
86 expansion front.

## 87 **Materials and Methods**

### 88 **Study area and samples**

89 From January 2018 to April 2020, 87 grackles were caught in the wild in several locations around  
90 Tempe, a city in Maricopa County, Arizona, using walk-in traps, bow nets, and mist nets. The

91 majority of individuals were caught on the campus of Arizona State University, while a small  
92 number were caught in a nearby city park. After capture, blood samples from each individual were  
93 obtained by brachial or medial metatarsal vein puncture, and then two to three thin blood smears  
94 were immediately prepared. The remaining blood sample was preserved in lysis buffer [41] for  
95 further molecular analysis. The birds were banded with colored leg bands in unique combinations  
96 for individual identification. Morphological measurements of weight, tarsus length, flattened wing  
97 length, tail length, skull length, bill length, and fat score (the amount of visible fat under the skin  
98 in the clavicle and abdomen as in [42]) were recorded. Such data was used to estimate the scaled  
99 mass index (SMI), which has become the primary method for quantifying energetic conditions  
100 within and among bird populations [43-45]. Then, grackles were either immediately released or  
101 temporarily brought into aviaries for behavioral testing (as part of other investigations [46-49])  
102 and then released back to the wild. A second blood sample was collected and processed as  
103 described above from those grackles kept in the aviaries to confirm the haemosporidian diagnostic  
104 before being released. Grackles sampled twice were considered infected even if they were PCR-  
105 positive at only one of the time points.

106

### 107 **Examination of blood films and molecular detection of haemosporidian parasites**

108 Blood smears were air-dried, fixed in absolute methanol for 5 min within 24 h of preparation, and  
109 then stained with 10% buffered Giemsa solution (pH 7.2) for 60 minutes. Blood films were  
110 examined with a Leica DM750 light microscope (Leica Microsystems, USA) equipped with a  
111 Leica ICC50 W camera and Leica Acquire software to capture images. Microscopic examination  
112 was carried out on blood smears that were deemed of high quality [50]. On those, 100 microscopic  
113 fields at low magnification ( $\times 400$ ), and 200 fields at high magnification ( $\times 1000$ ) were examined.

114 Parasitemia (intensity of infection) was estimated as the number of parasites/20,000 erythrocytes  
115 counted at high magnification.

116 DNA from whole blood preserved in lysis buffer was extracted using QIAamp DNA Micro  
117 Kit (QIAGEN GmbH, Hilden, Germany) per the manufacturer's protocol. Extracted DNA was  
118 screened to assess the presence of haemosporidians using a nested polymerase chain reaction  
119 (PCR) protocol that targets the parasite mitochondrial cytochrome b gene (*cytb*, 1,131 bp) with  
120 primers described by Pacheco et al. [51,52]. Primary PCR amplifications were carried out in a 50  
121  $\mu$ l volume with 4  $\mu$ l of total genomic DNA, 2.5 mM MgCl<sub>2</sub>, 1  $\times$  PCR buffer, 0.25 mM of each  
122 deoxynucleoside triphosphate, 0.4  $\mu$ M of each primer, and 0.03 U/ $\mu$ l AmpliTaq polymerase  
123 (Applied Biosystems, Thermo Fisher Scientific, USA). External PCR primers used were forward  
124 AE298 5'-TGT AAT GCC TAG ACG TAT TCC 3' and reverse AE299 5'-GT CAA WCA AAC  
125 ATG AAT ATA GAC 3'. Primary PCR conditions were: A partial denaturation at 94 °C for 4 min  
126 and 36 cycles with 1 min at 94 °C, 1 min at 53 °C, and 2 min extension step at 72 °C. In the last  
127 cycle, a final extension step of 10 min at 72 °C was added. Nested PCR mix and conditions were  
128 the same as the primary PCR but using 1  $\mu$ l of the primary PCRs and an annealing temperature of  
129 56 °C. Internal PCR primers used were forward AE064 5'-T CTA TTA ATT TAG YWA AAG  
130 CAC 3' and reverse AE066 5'-G CTT GGG AGC TGT AAT CAT AAT 3'. PCR amplified  
131 products (50  $\mu$ l) were excised from agarose gels and purified by the QIAquick Gel Extraction Kit  
132 (QIAGEN GmbH, Hilden, Germany). Both strands for the *cytb* fragments were directly sequenced  
133 at Genewiz from Azenta Life Sciences (New Jersey, USA). It is worth noting that an advantage of  
134 the PCR protocol used here is that it yields richer phylogenetic information derived from a larger  
135 *cytb* fragment [51].

136 All electropherograms were carefully inspected, and samples with double peaks were  
137 considered as having either mixed infections (two genetic lineages of the same parasite species) or  
138 coinfections (two distinct parasite genera). Sequences obtained from mixed/coinfections were  
139 compared against lineages from the MalAvi database [53] and against those lineages identified in  
140 single infections in our samples. In addition, Poly Peak Parser online software was used to confirm  
141 lineage identity in mixed/coinfections [54]. All sequences obtained in this study were deposited in  
142 GenBank under the accession numbers ON227196-ON227265.

143

#### 144 **Genetics and phylogenetic analyses**

145 *Cytb* sequences obtained in this study were identified as *Plasmodium* or *Haemoproteus* using  
146 BLAST against GenBank [55] and MalAvi [53] databases. Once the lineage was identified, their  
147 prevalence in the grackle population was estimated and compared according to sex, weight, and  
148 body condition (SMI). Few individuals were caught per month (1-11) throughout the year, and  
149 only 6 in total during June, July, and August. Thus, the effect of seasonality on haemosporidian  
150 prevalence could not be determined.

151 Phylogenetic relationships between the lineages found in grackles and other haemosporidians  
152 were inferred using four alignments. These nucleotide alignments were performed using ClustalX  
153 v2.0.12 and Muscle as implemented in SeaView v4.3.543 [56]. The first alignment was  
154 constructed with 42 sequences and included 454 bp (excluding gaps) out of the 1,134 bp of *cytb*  
155 gene. This fragment is the most commonly sequenced *cytb* fragment [57] that allows broader  
156 comparisons between our samples and those deposited in public databases such as GenBank [58]  
157 and MalAvi [53]. This alignment included six *Plasmodium* lineages identified in this study, one  
158 *Plasmodium* lineage previously reported in a grackle from Arizona (KY653785, QUIMEX01),

159 together with three *Plasmodium* sequences reported in grackles from Veracruz, Mexico  
160 (*Plasmodium homopolare* BAEBIC02, *Plasmodium nucleophilum* DENPET03, *Plasmodium* sp.  
161 QUIMEX02 [59]), as well as 28 *Plasmodium* identified to morphospecies level that had partial  
162 *cytb* gene data [60] available in GenBank [58] and MalAvi [53] at the time of this study. Four  
163 *Haemoproteus* (*Parahaemoproteus*) *cytb* sequences were included as an outgroup. A second  
164 alignment (N = 28) was done using the larger *cytb* fragment (945 bp out of the 1,134 bp, excluding  
165 gaps) [51] which overlaps with the most commonly sequenced *cytb* fragment [57]. This alignment  
166 included six *Plasmodium* lineages from this study, plus QUIMEX01 and those parasite species  
167 (N=22) with mtDNA genomes available [61]. Six *Haemoproteus* (*Parahaemoproteus*) and one  
168 *Leucocytozoon caulleryi* were included as an outgroup. Although it yielded a better phylogenetic  
169 signal than the phylogenetic tree using the small *cytb* fragment, it had less information in terms of  
170 isolates (N = 42 vs. 28). A third alignment (N=52) was done with the small *cytb* fragment  
171 sequences (467 out of the 1,134 bp of *cytb* gene, excluding gaps) of *Haemoproteus*  
172 (*Parahaemoproteus*) species (N=48) available in MalAvi database [53], including lineages from a  
173 previous study on grackles from Texas [37], and the *Haemoproteus* sp. sequence obtained in this  
174 study. In this case, four *Haemoproteus* (*Haemoproteus*) species were included as an outgroup.  
175 Finally, a fourth alignment (N = 22) was done using the larger *cytb* fragment (1,014 bp out of the  
176 1,134 bp of *cytb* gene, excluding gaps) of those *Haemoproteus* sp. (N=20) with mtDNA genomes  
177 available [61], plus the *Haemoproteus* sp. lineage sequence obtained here. Four *Haemoproteus*  
178 (*Haemoproteus*) and one *Leucocytozoon caulleryi* were included as an outgroup.

179 Phylogenetic trees were estimated using the Bayesian method implemented in MrBayes v3.2.6  
180 with the default priors [62], a general time-reversible model with gamma-distributed substitution  
181 rates, and a proportion of invariant sites (GTR +  $\Gamma$  + I). This model had the lowest Bayesian



182 Information Criterion (BIC) scores, as estimated by MEGA v7.0.26 [63]. Bayesian support was  
183 inferred for the nodes in MrBayes by sampling every 1,000 generations from two independent  
184 chains lasting  $2 \times 10^6$  Markov Chain Monte Carlo (MCMC) steps. The chains were assumed to  
185 have converged once the potential scale reduction factor (PSRF) value was between 1.00 and 1.02,  
186 and the average SD of the posterior probability was  $< 0.01$ . Once convergence was reached, 25%  
187 of the samples were discarded as a "burn-in" [62]. GenBank accession numbers and the MalAvi  
188 lineage codes for all sequences used in the analyses are shown in the phylogenetic tree figures.

189 In addition, the first and third alignments were also used to estimate the pairwise evolutionary  
190 divergences among the genetic lineages of *Plasmodium* (N=23, 454bp) and *Haemoproteus*  
191 species (N=5, 467bp) by using the Kimura 2-parameter model [64] as implemented in MEGA  
192 v7.0.26 [63].

193

#### 194 **Statistical analyses**

195 Test sensitivity was compared between PCR and microscopy using McNemar's Chi-squared test  
196 with continuity correction in R (ver. 4.0.3; R Development Core Team 2020). Prevalence and their  
197 95% confidence interval (CI) were estimated using the software Quantitative Parasitology on the  
198 Web (QPWeb) v.0.14 using the Clopper-Pearson method [65]. A Fisher exact test was used to  
199 determine non-random associations between being infected with *Plasmodium* and the host sex. In  
200 addition, a t-test was used to determine if there is a significant difference between infected and  
201 non-infected individuals in terms of (1) the mean of weight per sex and (2) SMI values estimated  
202 as in [66] per sex. These analyses were conducted during the first sampling before some of the  
203 birds were brought into the aviaries.

204

## 205 **Ethical statement and permits**

206 This research was carried out following protocols and sample collection approved by the  
207 Institutional Animal Care and Use Committee at Arizona State University (protocol number 17-  
208 1594R) and under the permits from the US Fish and Wildlife Service (scientific collecting permit  
209 number MB76700A-0,1,2), US Geological Survey Bird Banding Laboratory (federal bird banding  
210 permit number 23872), and Arizona Game and Fish Department (scientific collecting license  
211 number SP594338 (2017), SP606267 (2018), SP639866 (2019), and SP402153 (2020)). All  
212 methods were performed following the relevant guidelines and regulations.

213

## 214 **Results**

### 215 **Microscopic detection of haemosporidian parasites**

216 Out of 87 sampled grackles, 69 high-quality blood smears were analyzed from a total of 55 birds,  
217 14 of which had blood samples analyzed at two-time points. Forty-five samples were positive for  
218 haemosporidians by PCR, but parasites were detected by microscopy only in 17 blood smears. Ten  
219 of these samples had parasitemia (quantitative measure of parasites in the blood)  $\leq 0.01\%$ , and six  
220 samples had values between 0.015% and 0.02%. One grackle infected with the *Plasmodium*  
221 lineage PHPAT01 (identified by sequencing, see below) had parasitemia of 0.065% in the first  
222 sampling and a lower infection intensity four months later at the end of its time in the aviaries  
223 (parasitemia = 0.02%). Sequencing results from this second-time point revealed a different parasite  
224 (*P. homopolare*, LAIRI01), and this divergence in parasite identity was also confirmed  
225 morphologically (Fig 1A-E). From 24 PCR-negative samples, only one was positive by  
226 microscopy, displaying a 0.005% parasitemia.

227 *Plasmodium* gametocytes were detected in blood smears from samples that were PCR-positive  
228 for *Plasmodium* sp. (PHPAT01, Fig 1B), *P. homopolare* (LAIRI01, Fig 1D-E), and *Plasmodium*  
229 sp. (ZEMAC01, Fig 1F), confirming that grackles are competent hosts (the ability of a host to  
230 effectively transmit the parasite to a vector) for these parasites. No gametocytes were detected in  
231 samples positive for *Plasmodium* sp. (MOLATE01), *P. relictum* (GRW04), and *P. cathemerium*  
232 (SEIAUR01). However, immature parasites, likely to be trophozoites, were detected in 5 samples  
233 that were positive for the latter parasite (Fig 1G). One microgametocyte morphologically  
234 compatible with *P. cathemerium* (Fig 1H; [38]) was detected in a sample that was found infected  
235 with *Haemoproteus* by PCR with no signs of mixed infection (no double peaks visible in the  
236 electropherogram). A single *Haemoproteus* macrogametocyte was also detected in this blood  
237 smear (Fig 1I, parasitemia = 0,005%).

238

### 239 **Molecular detection of haemosporidian parasites, genetics, and phylogenetic analyses**

240 Detectability of haemosporidians was strongly discordant between microscopy and PCR  
241 (McNemar's Chi-squared = 23.31, df = 1,  $p < 0.0001$ ), with a higher detection rate in the latter.  
242 The nested PCRs detected a high haemosporidian prevalence in this grackle population from  
243 Tempe, Arizona (60.9%, n = 87; Table 1). *Plasmodium* prevalence was higher (59.8%) compared  
244 to *Haemoproteus* (1.1%, Table 1). There was no association between being infected and the host  
245 sex ( $p$ -value = 0.714). Overall, having a *Plasmodium* infection was not associated with differences  
246 in body weight and SMI for males and females ( $p > 0.05$ ).

247

248 **Table 1. Prevalence of haemosporidian parasites in a Great-tailed Grackle (*Quiscalus***  
249 ***mexicanus*) population sampled in Tempe, Arizona, between January 2018 and April 2020.**

|                                                   | <b>% Prevalence<br/>(Positive Indv./N Total)</b> | <b>95% C.I.</b> |
|---------------------------------------------------|--------------------------------------------------|-----------------|
| Individuals positive for haemosporidians          | 60.9 (53/87)                                     | 0.499-0.712     |
| Females positive for haemosporidians              | 57.6 (34/59)                                     | 0.441-0.704     |
| Males positive for haemosporidians                | 67.9 (19/28)                                     | 0.476-0.841     |
| Individuals positive for <i>Plasmodium</i> spp.   | 59.8 (52/87)                                     | 0.487-0.701     |
| Individuals positive for <i>Haemoproteus</i> spp. | 1.1 (1/87)                                       | 0.000-0.062     |
| Individuals with mixed/co-infections              | 18.5 (10/54)                                     | 0.093-0.314     |
| <b>Prevalence per haemosporidian lineages:</b>    |                                                  |                 |
| <i>Plasmodium cathemerium</i> (SEIAUR01)          | 24.1 (21/87)                                     | 0.156-0.345     |
| <i>Plasmodium homopolare</i> (LAIRI01)            | 18.4 (16/87)                                     | 0.109-0.281     |
| <i>Plasmodium relictum</i> (GRW04)                | 4.6 (4/87)                                       | 0.013-0.114     |
| <i>Plasmodium</i> sp. (MOLATE01)                  | 5.7 (5/87)                                       | 0.019-0.129     |
| <i>Plasmodium</i> sp. (PHPAT01)                   | 5.7 (5/87)                                       | 0.019-0.129     |
| <i>Plasmodium</i> sp. (ZEMAC01)                   | 1.1 (1/87)                                       | 0.000-0.062     |
| <i>Haemoproteus</i> sp. (SIAMEX01)                | 1.1 (1/87)                                       | 0.000-0.062     |

250 MalAvi lineages that match 100% to the grackle parasites found in this study are given in  
 251 parentheses. CI is the confidence interval.  
 252

253 Ten grackles (18.5%) showed mixed infections (two different *Plasmodium* lineages) by PCR,  
 254 and only one individual (1.9%) showed a coinfection of *Haemoproteus* and *Plasmodium* by  
 255 microscopy. Six out of ten mixed infections were solved using Poly Peak Parser online software,  
 256 and the combination of GRW04 and MOLATE01 was found in two individuals, SEIAUR01 and  
 257 PHPAT01 in three, LAIRI01 and SEIAUR01 in one.

258 By comparing the sequences from grackles with single infections with those deposited in  
 259 public databases [53,55], six *Plasmodium* lineages were detected (Tables 1). *Plasmodium*  
 260 *cathemerium* (lineage SEIAUR01) and *P. homopolare* (lineage LAIRI01) were the most prevalent  
 261 parasite species in this population (Tables 1 and 2, Fig 2). *Plasmodium relictum* lineage GRW04  
 262 was detected in low prevalence (Tables 1 and 2).

263 Genetic distance estimates among these six *cytb Plasmodium* lineages are shown in S1A Table.  
 264 The genetic distance between *P. cathemerium* (lineage SEIAUR01) and the lineage MOLATE01

265 was low ( $0.009 \pm 0.004$ ; S1A Table) and comparable to the genetic variation between lineages of  
266 parasites belonging to the same morphospecies (*P. relictum* GRW04 vs. GRW11 =  $0.020 \pm 0.006$ ;  
267 S1A Table). The genetic distance between lineages PHPAT01 and ZEMAC01 was lower ( $0.016$   
268  $\pm 0.006$ ) than the genetic distance between two closely related *Plasmodium* species (e.g., *P. unalis*  
269 and *P. vaughani* =  $0.033 \pm 0.008$ ; S1A Table). It was also low compared to the genetic distance  
270 between two lineages of *P. relictum* (e.g., GRW04 vs. GRW11 =  $0.020 \pm 0.006$ ; S1A Table). In  
271 the case of *Haemoproteus*, the genetic lineage SIAMEX01 found in the Arizonan grackles was  
272 100% identical (S1B Table) to a previously reported lineage SIAMEX01 found in Western  
273 bluebirds (*Sialia mexicana*) and lineage KF028P/CHI18PA found in grackles and the Tufted  
274 Titmouse (*Baeolophus bicolor*) from Texas [67].

275 The phylogenies obtained with the *Plasmodium* smaller (454 bp out of the 1,134 bp of *cytb*  
276 gene, excluding gaps) and larger *cytb* fragments (945 bp out of the 1,134 bp of *cytb* gene, excluding  
277 gaps) are shown in Fig 3 and S1A Fig respectively. The tree obtained using the larger fragment  
278 (S1A Fig) solved the relationship between the *Plasmodium* species with better support values in  
279 several clades, highlighting the importance of using longer *cytb* fragments when using  
280 phylogenetic methods. Both phylogenetic analyses share similarities and placed Arizonan grackle  
281 parasite sequences in four different clades.

282 *Plasmodium homopolare* lineage LAIRI01 (Fig 3) circulating in the grackle population has  
283 been reported in California Condor populations from Arizona (H2, MT341242; [68]). As expected  
284 by their genetic distance, lineages PHPAT01 and ZEMAC01 are closely related and form a  
285 monophyletic group with lineage QUIMEX01 (or MAP01, KY653785) also reported in a grackle  
286 from Arizona [61], and with *Plasmodium lutzi* and *Plasmodium matutinum* (Fig 3 and S1A Fig).

287 In this analysis, *P. cathemerium* (lineage SEIAUR01) and the lineage MOLATE01 shared a recent  
288 common ancestor with *P. relictum* (GRW11 and GRW04).

289 Phylogenetic relationships between *Haemoproteus* parasites are shown in Fig 4 and S1B Fig.  
290 In both phylogenies, *Haemoproteus* sp. SIAMEX01 (=KF028P=CHI18PA) found in grackles from  
291 Arizona shared a common ancestor with a lineage reported in grackles from Texas (PIPMAC01,  
292 [37]) and with *Haemoproteus lanii* (RB1). The genetic distance between *H. lanii* and the  
293 *Haemoproteus* lineage found in grackles from Arizona and Texas was  $0.039 \pm 0.008$  (S1B Table).

294

## 295 **Discussion**

296 In this study, a high haemosporidian prevalence (60.9%) and diversity of haemosporidian parasites  
297 (six *Plasmodium* lineages and one *Haemoproteus*) were detected in a grackle population from  
298 Arizona. This result contrasts with a previous study on 22 individuals in the same area that found  
299 no parasites using microscopy [69]. Such a difference could be explained, at least in part, by  
300 differences in sensitivity between PCR and microscopy in detecting haemosporidian parasites.

301 A prerequisite to making microscopy comparable with molecular detection methods is that  
302 experts extensively analyze high-quality blood smears [50], which was done in this study.  
303 However, no parasites were visualized in 60% of the positive samples by PCR. Indeed,  
304 parasitemias were below the detection level of standard microscopy ( $\leq 0.01\%$  if only 10,000  
305 erythrocytes are analyzed) in 59% of the blood smears in which parasites were detected. It has  
306 been shown that PCR can detect extremely low infection levels below the detectable microscopy  
307 threshold of approximately one parasite in a total of 50,000 examined cells [70]. This observation  
308 has been made in other Haemosporida, including human malaras [71]. A single parasite was  
309 detected in a blood smear from one PCR-negative sample out of 19 examined, revealing that the

310 PCR assay used here is likely to produce few false-negative results. However, it is worth noting  
311 that microscopy allowed for detecting gametocytes (the infective parasite stage for vectors),  
312 evidence that grackles are competent hosts.

313 This study suggests that grackles are highly susceptible to infection. Also, the prevalent low  
314 parasitemias (undetectable by microscopy) and no signs of clinical disease in this population  
315 indicate chronically infected birds. Such characteristics are consistent with parasite tolerance [72],  
316 meaning that grackles could be competent reservoirs able to transmit some of the haemosporidian  
317 lineages found here.

318 There was no evidence of grackle-specific Haemosporida in this recent expansion front, and  
319 *Plasmodium* was the most common parasite (59.8 % prevalence) circulating in this population. All  
320 *Plasmodium* parasite lineages found here infect many residents and migrant species in the New  
321 World and are common in other bird species found in Arizona and other areas across the USA.  
322 These include lineages of *P. cathemerium*, *P. homopolare*, and *P. relictum* (S2 Table [38,40,68]).

323 *Plasmodium cathemerium* (SEIUR01) has been detected in at least 33 bird species from 15  
324 families (Passeriformes and non-Passeriformes), including House Sparrows (*Passer domesticus*,  
325 Passeridae) from Arizona [73], grackles from Mexico (S2 Table [59]) and other Icteridae species  
326 from California (Fig 2, S2 Table [53,55]). A *Plasmodium* sp. (MOLATE01, Table 1) related to *P.*  
327 *cathemerium* has been recovered from 9 bird species from 7 families – including Icteridae species  
328 (Passeriformes) – in the USA, Mexico, and Peru (Fig 2, S2 Table [53,55]).

329 *Plasmodium homopolare* (LAIRI01, Fig 2), on the other hand, has been reported in Masked  
330 Bobwhite Quails (*Colinus virginianus ridgwayi*, Odontophoridae), Common Ravens (*Corvus*  
331 *corax*, Corvidae) [74], and California Condors (*Gymnogyps californianus*, Cathartidae; [68]) from  
332 Arizona, and in grackles from Mexico (S2 Table [59]). In addition, the lineage LAIRI01 has been

333 found in 26 bird species from 16 families (Passeriformes and non-Passeriformes), including other  
334 Icteridae species from nearby states (California and New Mexico) and across the Americas, with  
335 no reports in other continents (Fig 2, S2 Table [53,55]). Interestingly, Mexican grackles seem to  
336 be infected by the two *P. homopolare* lineages (LAIRI01 and BAEBIC02; [58]). In the case of *P.*  
337 *relictum*, the lineage GRW04 found in grackles is the most common *P. relictum* lineage in North  
338 America (>80%, [40]). The lineages found here in low prevalence, *Plasmodium* spp. ZEMAC01  
339 (previously detected in 13 bird species from 12 families of Passeriformes and non-Passeriformes)  
340 and PHPAT01 (previously found in 26 bird species from 10 families of Passeriformes and non-  
341 Passeriformes) are also generalists (Fig 2, S2 Table [53,55,74]). As reported in Brazil, the lineage  
342 PHPAT01 can cause severe malaria in Magellanic Penguins [75]. Given that the genetic distance  
343 between PHPAT01 and ZEMAC01 is lower than the distance between two lineages of *P. relictum*  
344 (e.g., GRW04 vs. GRW11, S1A Table), it is worth exploring whether these are haplotypes of the  
345 same uncharacterized *Plasmodium* morphospecies.

346 The high *Plasmodium* prevalence in grackles found in Arizona contrasts with the results from  
347 a recent study showing that *Haemoproteus* (*Parahaemoproteus*) prevalence was considerably  
348 higher (73%, n = 44/60) than *Plasmodium* (1.7%, n = 1/60) in grackles sampled in Texas [37]. Out  
349 of the six *Plasmodium* genetic lineages detected in Arizona, only *P. cathemerium* (SEIAUR01,  
350 Figs 1 and 2) was found in a grackle from Texas (1/60). In contrast, out of the three *Haemoproteus*  
351 (*Parahaemoproteus*) lineages found in Texas (SPIARB01, SIAMEX01, and PIPMAC01), two  
352 (SIAMEX01, PIPMAC01) appear to be haplotypes of the only *Haemoproteus* sp. found in Arizona  
353 (SIAMEX01) (Figs 2 and 3, S1A Table). Interestingly, the only *Haemoproteus* detected in Arizona  
354 (SIAMEX01) was the most abundant lineage (68.6%) in the grackle population from Texas. This  
355 lineage seems to be also a generalist parasite as it has been previously recorded in 15 bird species



356 from 10 families of Passeriformes and non-Passeriformes (S2 Table), including Icteridae species  
357 like Common Grackles from Michigan (*Quiscalus quiscula*, Icteridae; S2 Table S2) and  
358 Montezuma Oropendolas from Texas (*Psarocolius montezuma*). The life cycle of this  
359 *Haemoproteus* lineage and its pathology in different hosts remain unknown.

360 Although different sets of primers [76] were used for the nested PCRs in the study from Texas,  
361 all protocols employed here and in Golnar et al. [37] generally yield high sensitivity regardless of  
362 laboratory practice, parasite identity, and parasitemia [51,52,77]. *Haemoproteus* species were not  
363 found in blood smears from samples that were negative according to the PCR method, or in  
364 samples positive for *Plasmodium*, meaning that the PCR protocol employed here did not fail to  
365 detect *Haemoproteus* in our samples. Therefore, differences in parasite composition between  
366 grackles from Arizona (mostly infected by *Plasmodium*) and Texas (mostly infected by  
367 *Haemoproteus*) cannot be explained by methodological differences. It is worth noting that the only  
368 data available for haemosporidians in this species of grackles was the one from Texas [37] and  
369 some sequences available from Mexico [59]. Although no population studies on grackles have  
370 been conducted in Mexico, results obtained using similar protocols [59] from nine samples are  
371 consistent with the findings from Arizona. In particular, only *Plasmodium* spp. has been found,  
372 and four different parasite species (and five lineages) were detected by nested PCR (Fig 3; S2  
373 Table [59]) in grackles sampled in Mexico.

374 The lineages found in grackles also can infect the two most common, year-round, and  
375 widespread birds, House Sparrows (an invasive species) and House Finches. These three species  
376 (grackles, House Sparrows, and House Finches) are found in sympatry in the study area (McCune  
377 KB, Personal Communication; [https://ebird.org/barchart?byr=2018&eyr=2020&bmo=1&emo=12&r=US-AZ-](https://ebird.org/barchart?byr=2018&eyr=2020&bmo=1&emo=12&r=US-AZ-013)  
378 013). The extent to which the transmission dynamics of haemosporidian parasites can be affected

379 by tolerant and highly competent host species, or a guild of such host species, should be explored.  
380 Indeed, putative guilds of competent and relatively abundant hosts, including recently established  
381 species like the grackles or invasive species, such as the House Sparrow, are commonly found in  
382 urban and peri-urban areas. Specific inferences could be made if such a guild is relevant in terms  
383 of the haemosporidian parasite transmission in a particular area; for example, it could be expected  
384 that commonly abundant birds could favor some lineages of the local pool of parasite species. Such  
385 dynamics can affect the viability of other host species that exhibit less tolerance to certain parasites  
386 [74] or affect the composition of the local parasite species pool. Therefore, as the data suggests, it  
387 can be hypothesized that, as grackles expand geographically, they can transmit local generalist  
388 parasites rather than introducing new species into the parasite species pool. Thus, as a susceptible  
389 and tolerant host species [72], grackles could disproportionately transmit generalist parasites.

390 Avian *Plasmodium* species are transmitted by Culicidae insects, more commonly by *Culex*  
391 mosquitoes, while *Haemoproteus* (*Parahaemoproteus*) parasites are transmitted by biting midges  
392 of the genus *Culicoides* [78]. Grackles in the Arizona study area are found in urban landscapes  
393 with a source of surface water (e.g., ponds and lakes). Such sites are important for mosquito  
394 reproduction, increasing the probability of *Plasmodium* infections and transmission in the vicinity  
395 of lakes and ponds [79-82]. Also, it has been reported that *Plasmodium* is more prevalent than  
396 *Haemoproteus* species in urban greenspaces and peri-urban areas, suggesting that some parasite  
397 lineages could benefit from urbanization [83], which may explain the higher *Plasmodium*  
398 prevalence in Arizona. However, the urban area where grackles were sampled in Texas [37] has a  
399 high diversity of biting midges, and their molecular testing revealed a 2% infection rate for  
400 *Haemoproteus* in these insects [84]. It is possible that local differences in the vegetation and  
401 grackle behavior may expose them to different vectors. Bird species foraging at the canopy level

402 have a higher probability of being infected with *Haemoproteus* than with *Plasmodium* [85],  
403 meaning that differences in foraging behavior between grackle populations could also contribute  
404 to contrasting results in haemosporidian assemblages. Thus, microclimatic conditions, vegetation,  
405 and differences in bird behavior may explain the differences between the populations from Texas  
406 and Arizona. Such differences may relate to land-use types and the specific environmental  
407 requirements of their different vectors, determining the local higher prevalence of one parasite  
408 genus over another.

409 In conclusion, the grackles are a highly susceptible and tolerant host species for  
410 haemosporidian parasites that harbor infections with low parasitemia. This species seems to  
411 acquire the local parasite species pool rather than expand the geographic range of particular  
412 "grackle-specific" lineages. Together with other species with similar characteristics, grackles may  
413 be part of community-level processes driving the parasite transmission of some haemosporidian  
414 lineages that remain poorly understood. Such dynamics involving guilds of multiple hosts remain  
415 unknown. It can be proposed that the haemosporidian species pool in bird assemblages containing  
416 guilds of tolerant and competent hosts in urban and peri-urban areas could be a suitable model for  
417 understanding the effects of host competence in a community context.

418

## 419 **Acknowledgments**

420 The authors express their sincere gratitude to Melissa Folsom, Carolyn Rowney, and Luisa M.  
421 Bergeron for trapping and/or collecting/processing blood from some of the grackles involved in  
422 this research, and to Richard McElreath in the Department of Human Behavior, Ecology and  
423 Culture at the Max Planck Institute for Evolutionary Anthropology for funding. We thank Andrew  
424 J. Golnar and Gabriel L. Hamer for sharing the data obtained from Texas. We thank Ariana Cristina

425 Pacheco Negrin for designing the map and grackle silhouette. FCF was supported by National  
426 Science Foundation (DEB 1717498). DS-A and SAM were supported by CONACYT, project  
427 number Ciencia Básica 2011-01-168524.

428

## 429 **References**

- 430 1. Johnson K, Peer BD. Great-tailed grackle (*Quiscalus mexicanus*). In: Poole A, Gill F, editors.  
431 The birds of North America, No. 576. The Birds of North America, Inc., Philadelphia; 2001.
- 432 2. Fischer JD, Schneider SC, Ahlers AA, Miller JR. Categorizing wildlife responses to  
433 urbanization and conservation implications of terminology. *Conserv Biol.* 2015;29: 1246-  
434 1248.
- 435 3. Chesser RT, Billerman SM, Burns KJ, Cicero C, Dunn JL, Hernández-Baños BE, et al. Check-  
436 list of North American Birds (online). American Ornithological Society.  
437 <http://checklist.aou.org/taxa>.
- 438 4. Wehtje W. The range expansion of the great-tailed grackle (*Quiscalus mexicanus* Gmelin) in  
439 North America since 1880. *J Biogeogr.* 2003;30: 1593–1607.
- 440 5. Phillips AR. The Great-Tailed Grackles of the Southwest. *Condor.* 1950;52: 78-81.
- 441 6. Phillips AR. The instability of the distribution of land birds in the Southwest. *Pap Archaeol*  
442 *Soc New Mex.* 1968;1: 129-162.
- 443 7. Avise JC, Zink RM. Molecular genetic divergence between avian sibling species: King and  
444 Clapper Rails, Long-Billed and Short-Billed Dowitchers, Boat-Tailed and Great-Tailed  
445 Grackles, and Tufted and Black-Crested Titmice. *Auk.* 1988;105: 516-528.
- 446 8. Bjorklund M. Evolution, phylogeny, sexual dimorphism and mating system in the grackles  
447 (*Quiscalus* spp.: Icterinae). *Evolution.* 1991;45: 608-621.
- 448 9. Zink RM, Rootes WL, Dittmann DL. Mitochondrial DNA variation, population structure, and  
449 evolution of the Common Grackle (*Quiscalus quiscula*). *Condor.* 1991;93: 318-329.
- 450 10. Freeman S, Zink RM, A phylogenetic study of the blackbirds based on variation in  
451 mitochondrial DNA restriction sites. *Syst Biol.* 1995;44: 409-420.
- 452 11. Johnson KP, Lanyon SM. Molecular systematics of the grackles and allies, and the effect of  
453 additional sequence (CYT B and ND2). *Auk.* 1999;116: 759-768.
- 454 12. Lanyon SM, Omland KE. A molecular phylogeny of the blackbirds (Icteridae): Five lineages  
455 revealed by cytochrome-b sequence data. *Auk.* 1999;116: 629-639.
- 456 13. DaCosta JM, Wehtje W, Klicka J. Historic genetic structuring and paraphyly within the Great-  
457 tailed Grackle. *Condor.* 2008;110: 170–177.
- 458 14. Powell AFLA, Barker FK, Lanyon SM. A complete species-level phylogeny of the grackles  
459 (*Quiscalus* spp.), including the extinct slender-billed grackle, inferred from mitochondrial  
460 DNA. *Condor.* 2008;110: 718-728.
- 461 15. Kok OB. Vocal behavior of the Great-tailed Grackle (*Quiscalus mexicanus prosopidicola*).  
462 *Condor.* 1971;73: 348-363.

- 463 16. Logan CJ. Behavioral flexibility and problem solving in an invasive bird. *PeerJ*. 2016; 4:  
464 e1975.
- 465 17. Logan CJ, McCune KB, MacPherson M, Johnson-Ulrich Z, Rowney C, Seitz B. et al. Are the  
466 more flexible individuals also better at inhibition? *Anim Behav Cogn*. 2022; 9: 14-36.
- 467 18. Seitz BM, McCune K, MacPherson M, Bergeron L, Blaisdell AP, Logan CJ. Using touchscreen  
468 equipped operant chambers to study animal cognition. Benefits, limitations, and advice. *PLoS*  
469 *One*. 2021;16: e0246446.
- 470 19. Yorzinski JL. Great-tailed grackles can independently direct their eyes toward different targets.  
471 *Exp Brain Res*. 2021;239: 2119-2126.
- 472 20. Gotie RF, Kroll JC. Growth rate and ontogeny of thermoregulation in nestling Great-Tailed  
473 Grackles, *Cassidix mexicanus prosopidicola* (Icteridae). *Condor*. 1973;75: 190–199.
- 474 21. Teather KL, Weatherhead PJ. Sex-specific energy requirements of Great-tailed Grackle  
475 (*Quiscalus mexicanus*) nestlings. *J Anim Ecol*. 1988;57: 659-668.
- 476 22. Weatherhead PJ, Teather KL. Are skewed fledgling sex ratios in sexually dimorphic birds  
477 adaptive? *Am Nat*. 1991;138: 1159-1172.
- 478 23. Weatherhead PJ, Teather KL. Teather. Sexual size dimorphism and egg-size allometry in birds.  
479 *Evolution*. 1994; 48: 671-678.
- 480 24. Johnson K, DuVal E, Kiehl M, Hughes C. Male mating strategies and the mating system of  
481 great-tailed grackles. *Behav Ecol*. 2000;11: 132–141.
- 482 25. Stepney PHR. First recorded breeding of the Great-Tailed Grackle in Colorado. *Condor*.  
483 1975;77: 208-210.
- 484 26. Arnold KA, Folse LJJr. Movements of the Great-Tailed Grackle in Texas. *Wilson Bull*.  
485 1977;89: 602-608.
- 486 27. Guillory HD, Deshotels JH, Guillory C. Great-Tailed Grackle reproduction in southcentral  
487 Louisiana. *J Field Ornithol*. 1981; 52: 325-331.
- 488 28. Dinsmore JJ, Dinsmore SJ. Range Expansion of the Great-tailed Grackle in the 1900s. *Journal*  
489 *of the Iowa Academy of Science: JIAS*. 1993;100: 54-59.
- 490 29. Scheuering EJ, Ivey GL. First nesting of the Great-tailed Grackle in Oregon. *Wilson*  
491 *Bull*.1995;107: 562–563.
- 492 30. Christensen AF. The fifteenth- and twentieth-century colonization of the basin of Mexico by  
493 the Great-tailed Grackle (*Quiscalus mexicanus*). *Glob Ecol Biogeogr*. 2000;9: 415–420.
- 494 31. Ferraguti M, Martínez-de la Puente J, Jiménez-Clavero MÁ, Llorente F, Roiz D, Ruiz S, et al.  
495 A field test of the dilution effect hypothesis in four avian multi-host pathogens. *PLoS Pathog*.  
496 2021;17: e1009637.
- 497 32. Guerrero-Sánchez S, Cuevas-Romero S, Nemeth NM, Trujillo-Olivera MT, Worwa G, Dupuis  
498 A, et al. West Nile virus infection of birds, Mexico. *Emerg Infect Dis*. 2011;17: 2245-52.
- 499 33. Morales-Betoulle ME, Komar N, Panella NA, Alvarez D, López MR, Betoulle JL, et al. West  
500 Nile virus ecology in a tropical ecosystem in Guatemala. *Am J Trop Med Hyg*. 2013;88: 116-  
501 26.
- 502 34. Komar N, Panella NA, Young GR, Brault AC, Levy CE. Avian hosts of West Nile virus in  
503 Arizona. *Am J Trop Med Hyg*. 2013;89: 474-481.

- 504 35. Komar N, Colborn JM, Horiuchi K, et al. Reduced West Nile virus transmission around  
505 communal roosts of Great-Tailed Grackle (*Quiscalus mexicanus*). *Ecohealth*. 2015;12: 144-  
506 151.
- 507 36. Alvarado-Esquivel C, Rajendran C, Ferreira LR, Kwok OC, Choudhary S, Alvarado-Esquivel  
508 D, et al. Prevalence of *Toxoplasma gondii* infection in wild birds in Durango, Mexico. *J*  
509 *Parasitol*. 2011;97: 809-812.
- 510 37. Golnar AJ, Medeiros MCI, Rosenbaum K, Bejcek J, Hamer SA, Hamer GL. Vector-borne  
511 blood parasites of the Great-Tailed Grackle (*Quiscalus mexicanus*) in East-Central Texas,  
512 USA. *Microorganisms*. 2021;9: 504.
- 513 38. Valkiūnas G. Avian malaria parasites and other haemosporidia. Boca Raton, Florida: CRC  
514 Press; 2005.
- 515 39. Valkiūnas G, Ilgūnas M, Bukauskaitė D, Fagner K, Weissenböck H, Atkinson CT, et al.  
516 Characterization of *Plasmodium relictum*, a cosmopolitan agent of avian malaria. *Malar J*.  
517 2018;17: 184.
- 518 40. Martínez-de la Puente J, Santiago-Alarcon D, Palinauskas V, Bensch S. *Plasmodium relictum*.  
519 *Trends Parasitol*. 2021;37: 355-356.
- 520 41. White PS, Densmore LD. Mitochondrial DNA isolation. In: Hoezel AR Editor. *Molecular*  
521 *genetic analysis of populations: A Practical Approach*. IRL Press, Oxford University Press,  
522 New York, USA; 1992. pp. 29-58.
- 523 42. Kaiser A. A new multi-category classification of subcutaneous fat deposits of songbirds. *J*  
524 *Field Ornithol*. 1993;64: 246-255.
- 525 43. Maceda-Veiga A, Green AJ, De Sostoa A. Scaled body-mass index shows how habitat quality  
526 influences the condition of four fish taxa in north-eastern Spain and provides a novel indicator  
527 of ecosystem health. *Freshw Biol*. 2014;59: 1145–1160.
- 528 44. Delciellos AC, Barros CS, Prevedello JA, Ferreira MS, Cerqueira R, Vieira MV. Habitat  
529 fragmentation affects individual condition: Evidence from small mammals of the Brazilian  
530 Atlantic forest. *J Mammal*. 2018;99: 936–945.
- 531 45. English MD, Robertson GJ, Peck LE, Pirie-Hay D, Roul S, Mallory ML. Body condition of  
532 American Black Ducks (*Anas rubripes*) wintering in Atlantic Canada using carcass composition  
533 and a scaled mass index. *Can J Zool*. 2018;96: 1137–1144.
- 534 46. Sevchik A, Logan CJ, McCune K, Blackwell AD, Rowney C, Lukas D. Investigating sex  
535 differences in genetic relatedness in Great-tailed Grackles in Tempe, Arizona to infer potential  
536 sex biases in dispersal (version 5 of this preprint has been peer-reviewed and recommended by  
537 Peer Community In Ecology. 2021; <https://doi.org/10.24072/pci.ecology.100074> and  
538 <https://doi.org/10.32942/osf.io/t6beh>).
- 539 47. Blaisdell A, Seitz B, Rowney C, Folsom M, MacPherson M, Deffner D, Logan C.J. Do the  
540 more flexible individuals rely more on causal cognition? Observation versus intervention in  
541 causal inference in Great-tailed Grackles (version 5 of this preprint has been peer reviewed  
542 and recommended by Peer Community In Ecology. 2021;  
543 <https://doi.org/10.24072/pci.ecology.100076> and <https://doi.org/10.31234/osf.io/z4p6s>
- 544 48. Logan CJ, McCune K, MacPherson M, Johnson-Ulrich Z, Rowney C, et al. Are the more  
545 flexible Great-tailed Grackles also better at behavioral inhibition? 2021;  
546 <https://doi.org/10.31234/osf.io/vpc39>.

- 547 49. Logan CJ, Blaisdell A, Johnson-Ulrich Z, Lukas D, MacPherson M, Seitz BM, et al. Behavioral  
548 flexibility is manipulatable and it improves flexibility and problem solving in a new context.  
549 2022; <https://doi.org/10.32942/osf.io/5z8xs>.
- 550 50. Valkiūnas G, Atkinson CT, Bensch S, Sehgal RN, Ricklefs RE. Parasite misidentifications in  
551 GenBank: how to minimize their number? Trends Parasitol. 2008;24: 247-248.
- 552 51. Pacheco MA, Cepeda AS, Bernotienė R, Lotta IA, Matta NE, Valkiūnas G, et al. Primers  
553 targeting mitochondrial genes of avian haemosporidians: PCR detection and differential DNA  
554 amplification of parasites belonging to different genera. Int J Parasitol. 2018;48: 657-670.
- 555 52. Pacheco MA, García-Amado MA, Manzano J, Matta NE, Escalante AA. Blood parasites  
556 infecting the Hoatzin (*Opisthocomus hoazin*), a unique neotropical folivorous bird. PeerJ.  
557 2019;7: e6361.
- 558 53. Bensch S, Hellgren O, Pérez-Tris J. MalAvi: a public database of malaria parasites and related  
559 haemosporidians in avian hosts based on mitochondrial cytochrome b lineages. Mol Ecol  
560 Resour. 2009;9: 1353-1358.
- 561 54. Hill JT, Demarest BL, Bisgrove BW, Su YC, Smith M, Yost HJ. Poly peak parser: Method  
562 and software for identification of unknown indels using sanger sequencing of polymerase chain  
563 reaction products. Dev Dyn. 2014;243: 1632-1636.
- 564 55. Altschul SF, Madden TL, Schäffer AA, Zhang J, Zhang Z, Miller W, Lipman DJ. Gapped  
565 BLAST and PSI-BLAST: a new generation of protein database search programs. Nucleic  
566 Acids Res. 1997;25: 3389-402.
- 567 56. Gouy M, Guindon S, Gascuel O. SeaView version 4: A multiplatform graphical user interface  
568 for sequence alignment and phylogenetic tree building. Mol Biol Evol. 2010;27: 221-224.
- 569 57. Benson DA, Cavanaugh M, Clark K, Karsch-Mizrachi I, Lipman DJ, Ostell J, et al. GenBank.  
570 Nucleic Acids Res. 2013;41: D36-42.
- 571 58. Alvarez-Mendizábal P, Villalobos F, Rodríguez-Hernández K, Hernández-Lara C, Rico-  
572 Chávez O, Suzán G, et al. Metacommunity structure reveals that temperature affects the  
573 landscape compositional patterns of avian malaria and related haemosporidian parasites across  
574 elevations. Acta Oecol. 113: 2021: 103789.
- 575 59. Valkiūnas G, Iezhova TA. Keys to the avian malaria parasites. Malar J. 2018;17: 212.
- 576 60. Hellgren O, Waldenström J, Bensch S. A new PCR assay for simultaneous studies of  
577 *Leucocytozoon*, *Plasmodium*, and *Haemoproteus* from avian blood. J Parasitol. 2004;90: 797-  
578 802.
- 579 61. Pacheco MA, Matta NE, Valkiūnas G, Parker PG, Mello B, Stanley CE Jr, et al. Mode and rate  
580 of evolution of haemosporidian mitochondrial genomes: Timing the radiation of avian  
581 parasites. Mol Biol Evol. 2018;35: 383-403.
- 582 62. Ronquist F, Huelsenbeck JP. MrBayes 3: Bayesian phylogenetic inference under mixed  
583 models. Bioinformatics. 2003;19: 1572-1574.
- 584 63. Kumar S, Stecher G, Tamura K. MEGA7: Molecular evolutionary genetics analysis version  
585 7.0 for bigger datasets. Mol Biol Evol. 2016;33: 1870-1874.
- 586 64. Kimura M. A simple method for estimating evolutionary rate of base substitutions through  
587 comparative studies of nucleotide sequences. J Mol Evol. 1980;16: 111-120.
- 588 65. Reiczigel J, Marozzi M, Fábíán I, Rózsa L. Biostatistics for Parasitologists - A Primer to  
589 Quantitative Parasitology. Trends Parasitol. 2019;35: 277-281.

- 590 66. Peig J, Green AJ. New perspectives for estimating body condition from mass/length data: The  
591 scaled mass index as an alternative method. *Oikos*. 2009;118: 1883–1891.
- 592 67. Fast KM, Walstrom VW, Outlaw DC. Haemosporidian prevalence and parasitemia in the  
593 Tufted Titmouse (*Baeolophus bicolor*). *J Parasitol*. 2016;102: 636-642.
- 594 68. Pacheco MA, Parish CN, Hauck TJ, Aguilar RF, Escalante AA. The endangered California  
595 Condor (*Gymnogyps californianus*) population is exposed to local haemosporidian parasites.  
596 *Sci Rep*. 2020;10: 17947.
- 597 69. Toomey MB, Butler MW, Meadows MG, Taylor LA, Fokidis HB, McGraw KJ. A novel  
598 method for quantifying the glossiness of animals. *Behav Ecol Sociobiol*. 2010;64: 1047–1055.
- 599 70. Valkiūnas G, Iezhova TA, Loiseau C, Sehgal RN. Nested cytochrome B polymerase chain  
600 reaction diagnostics detect sporozoites of hemsporidian parasites in peripheral blood of  
601 naturally infected birds. *J Parasitol*. 2009;95: 1512-1515.
- 602 71. Escalante AA, Ferreira MU, Vinetz JM, Volkman SK, Cui L, Gamboa D, et al. Malaria  
603 molecular epidemiology: Lessons from the International Centers of Excellence for Malaria  
604 Research Network. *Am J Trop Med Hyg*. 2015;93: 79-86.
- 605 72. Hawley DM, Altizer SM. Disease ecology meets ecological immunology: understanding the  
606 links between organismal immunity and infection dynamics in natural populations. *Funct Ecol*.  
607 2011;25: 48–60.
- 608 73. Marzal A, Ricklefs RE, Valkiūnas G, Albayrak T, Arriero E, Bonneaud C, et al. Diversity,  
609 loss, and gain of malaria parasites in a globally invasive bird. *PLoS One*. 2011;6: e21905.
- 610 74. Pacheco MA, Escalante AA, Garner MM, Bradley GA, Aguilar RF. Haemosporidian infection  
611 in captive Masked Bobwhite Quail (*Colinus virginianus ridgwayi*), an endangered subspecies  
612 of the northern bobwhite quail. *Vet Parasitol*. 2011;182: 113-120.
- 613 75. Vanstreels RET, Dutra DA, Ferreira-Junior FC, Hurtado R, Egert L, Mayorga LFSP, et al.  
614 Epidemiology, hematology, and unusual morphological characteristics of *Plasmodium* during  
615 an avian malaria outbreak in penguins in Brazil. *Parasitol Res*. 2019;118: 3497-3508.
- 616 76. Fallon SM, Ricklefs RE, Swanson BL, Bermingham E. Detecting avian malaria: An improved  
617 polymerase chain reaction diagnostic. *J Parasitol*. 2003;89: 1044-1047.
- 618 77. Fecchio A, Lima MR, Svensson-Coelho M, Marini MÂ, Ricklefs RE. Structure and  
619 organization of an avian haemosporidian assemblage in a Neotropical savanna in Brazil.  
620 *Parasitology*. 2013;140: 181-92.
- 621 78. Ferreira, F.C., Santiago-Alarcon, D., Braga, É.M. Diptera vectors of avian haemosporidians:  
622 With emphasis on tropical regions. In: Santiago-Alarcon, D., Marzal, A. Editors. *Avian*  
623 *Malaria and Related Parasites in the Tropics*. Springer, Cham; 2020. pp: 185-250.
- 624 79. Kettle DS. *Medical and veterinary entomology*. CAB International, Oxon, UK; 1995.
- 625 80. Krams I, Cīrule D, Krama T, Hukkanen M, Rytönen S, Orell, et al. Effects of forest  
626 management on haematological parameters, blood parasites, and reproductive success of the  
627 Siberian tit (*Poecile cinctus*) in northern Finland. *Annales Zoologici Fennici*. 2010;47: 335-  
628 346.
- 629 81. Njabo KY, Cornel AJ, Bonneaud C, Toffelmier E, Sehgal RN, Valkiūnas G, et al. Nonspecific  
630 patterns of vector, host and avian malaria parasite associations in a central African rainforest.  
631 *Mol Ecol*. 2011;20: 1049-1061.



- 632 82. Krama T, Krams R, Cīrule D, Moore FR, Rantala MJ, Krams IA. Intensity of haemosporidian  
633 infection of parids positively correlates with proximity to water bodies, but negatively with  
634 host survival. *J Ornithol.* 2015;156: 1075–1084.
- 635 83. Hernández-Lara C, Carbó-Ramírez P, Santiago-Alarcon D. Effects of land use change (rural-  
636 urban) on the diversity and epizootiological parameters of avian Haemosporida in a widespread  
637 neotropical bird. *Acta Trop.* 2020;209: 105542.
- 638 84. Martin E, Chu E, Shults P, Golnar A, Swanson DA, Benn J, et al. Culicoides species  
639 community composition and infection status with parasites in an urban environment of east  
640 central Texas, USA. *Parasit Vectors.* 2019;12: 39.
- 641 85. DeBrock S, Cohen E, Balasubramanian S, Marra PP, Hamer SA. Characterization of the  
642 *Plasmodium* and *Haemoproteus* parasite community in temperate-tropical birds during spring  
643 migration. *Int J Parasitol Parasites Wildl.* 2021;15: 12-21.

644

#### 645 **Data Availability Statement**

646 All sequences obtained in this study were deposited in GenBank under the accession numbers  
647 ON227196-ON227265.

#### 648 **Competing interests**

649 The authors declare no competing interests.

#### 650 **Author Contributions**

651 **Conceptualization:** M. Andreína Pacheco, Ananias A. Escalante, Corina J. Logan, Francisco  
652 C. Ferreira.

653 **Data curation:** M. Andreína Pacheco.

654 **Formal analysis:** M. Andreína Pacheco, Francisco C. Ferreira.

655 **Funding acquisition:** Corina J. Logan.

656 **Investigation:** M. Andreína Pacheco, Francisco C. Ferreira, Corina J. Logan, Kelsey B.  
657 McCune, Sergio Albino Miranda, Diego Santiago-Alarcon and Ananias A. Escalante, Maggie  
658 P. MacPherson.

659 **Methodology:** M. Andreína Pacheco, Francisco C. Ferreira, Corina J. Logan, Kelsey B.  
660 McCune, Sergio Albino Miranda.

661 **Project administration:** Corina J. Logan.

662 **Resources:** Corina J. Logan, Ananias A. Escalante.

663 **Supervision:** M. Andreína Pacheco, Ananias A. Escalante, Corina J. Logan, Kelsey B.  
664 McCune.

665 **Validation:** M. Andreína Pacheco, Francisco C. Ferreira, Ananias A. Escalante, Corina J.  
666 Logan.

667 **Visualization:** M. Andreína Pacheco, Francisco C. Ferreira.

668 **Writing – original draft:** M. Andreína Pacheco, Ananias A. Escalante.

669 **Writing – review & editing:** M. Andreína Pacheco, Ananias A. Escalante, Francisco C.  
670 Ferreira, Corina J. Logan, Sergio Albino Miranda, Diego Santiago-Alarcon, Kelsey B.  
671 McCune, Maggie P. MacPherson.  
672

## 673 **Supporting information**

### 674 **Supporting figures.**

675 **S1 Figure. Bayesian phylogenetic hypotheses of haemosporidian parasites infecting Great-**  
676 **tailed Grackles (*Quiscalus mexicanus*) from Arizona, USA.** Phylogenetic trees were computed  
677 based on larger fragments of (A) *Plasmodium* sequences of *cytb* gene (945 bp out of the 1,134 bp  
678 of *cytb* gene, excluding gaps) and (B) *Haemoproteus* sequences of *cytb* gene (1,014 bp out of the  
679 1,134 bp of *cytb* gene, excluding gaps). Values above branches are posterior probabilities.  
680 *Leucocytozoon* and *Haemoproteus* (*Haemoproteus*) genera (outgroup) are indicated in grey.  
681 Genbank accession numbers and lineage identifiers, as deposited in the MalAvi database, are  
682 provided in parenthesis for the sequences used in the analyses. *Plasmodium* and *Haemoproteus*  
683 (*Parahaemoproteus*) recovered from grackles from Arizona are written in blue. Lineages detected  
684 in grackles from Texas [37] are indicated with a red asterisk and from Mexico with a green asterisk.

### 685 **Supporting tables.**

686 **S1 Table. Estimates of evolutionary divergence between *cytb* (A) *Plasmodium* and (B)**  
687 ***Haemoproteus* parasites sequences.**

688 **S2 Table. GenBank and MalAvi records related to the haemosporidian lineages recovered**  
689 **from grackles from Arizona.** Bird species of the Icteridae family infected with the lineages found  
690 in this study are highlighted in blue and bird species from Arizona in yellow. The distribution and  
691 frequency of *P. relictum* can be found in [40].

692

## 693 **Figure Legends**

694 **Figure 1. Blood stages of haemosporidian parasites infecting Great-tailed Grackles**  
695 **(*Quiscalus mexicanus*) from Tempe, Arizona.** Meront (A) and macrogametocyte (B) visualized  
696 in a sample positive for *Plasmodium* sp. lineage PHPAT01. Meront (C) and gametocytes (D,E) of  
697 *Plasmodium homopolare* (LAIRI01). Gametocyte (F) in a sample positive for *Plasmodium* sp.  
698 lineage ZEMAC01. Immature parasite (G), likely a trophozoite, detected in a sample positive for  
699 *Plasmodium cathemerium*. Microgametocyte morphologically similar to *P. cathemerium* (H) and  
700 *Haemoproteus* sp. macrogametocyte (I) detected in a sample positive for *Haemoproteus* sp.  
701 (SIAMEX01). Giemsa-stained blood films. Scale bar = 10  $\mu$ m.

702 **Figure 2. Map of the American continent showing the geographical distribution of**  
703 **haemosporidian lineages found in this study.** The prevalence of each lineage is given in  
704 parenthesis. Color squares and values in the charts indicate continents and the global distribution  
705 of these lineages (MalAvi database, [53]), respectively, and color ovals represent the lineages. The  
706 distribution of *P. relictum* can be found in [40]. The grackle expansion range is indicated with  
707 black lines. Ariana Cristina Pacheco Negrin designed the map and grackle silhouette.

708 **Figure 3. Bayesian phylogenetic hypothesis of *Plasmodium* parasites infecting Great-tailed**  
709 **Grackles (*Quiscalus mexicanus*) from Arizona, USA.** Phylogenetic tree was computed based on  
710 parasites smaller *cytb* gene fragment (454 bp out of the 1,134 bp of *cytb* gene, excluding gaps).  
711 The values above branches are posterior probabilities. *Haemoproteus* (*Parahaemoproteus*) spp.  
712 (outgroup) are indicated in grey. Genbank accession numbers and their lineage identifiers, as  
713 deposited in the MalAvi database, are provided in parenthesis for the sequences used in the  
714 analysis. *Plasmodium* lineages recovered from grackles are written in blue, and the total of  
715 individuals infected with a given lineage in relation to the number of *Plasmodium*-positive samples  
716 is indicated. *Plasmodium cathemerium* was also detected in grackles from Texas [37] and is

717 indicated with a red asterisk and parasites reported in Mexico are indicated with a green asterisk.  
718 Light yellow boxes indicate the lineages found in Arizona.  
719 **Figure. 4. Bayesian phylogenetic hypothesis of *Haemoproteus* lineage infecting the Great-**  
720 **tailed Grackles (*Quiscalus mexicanus*) from Arizona, USA.** The phylogenetic tree was  
721 computed based on parasites smaller *cytb* gene fragment (467 out of the 1,134 bp of *cytb* gene,  
722 excluding gaps). The values above branches are posterior probabilities. *Haemoproteus*  
723 (*Haemoproteus*) spp. (outgroup) are indicated in grey. Genbank accession numbers and lineage  
724 identifiers, as deposited in the MalAvi database, are provided in parenthesis for the sequences used  
725 in the analysis. *Haemoproteus* (*Parahaemoproteus*) lineage recovered from a grackle in this study  
726 is written in blue. Lineages detected in grackles from Texas [37] are indicated with a red asterisk.

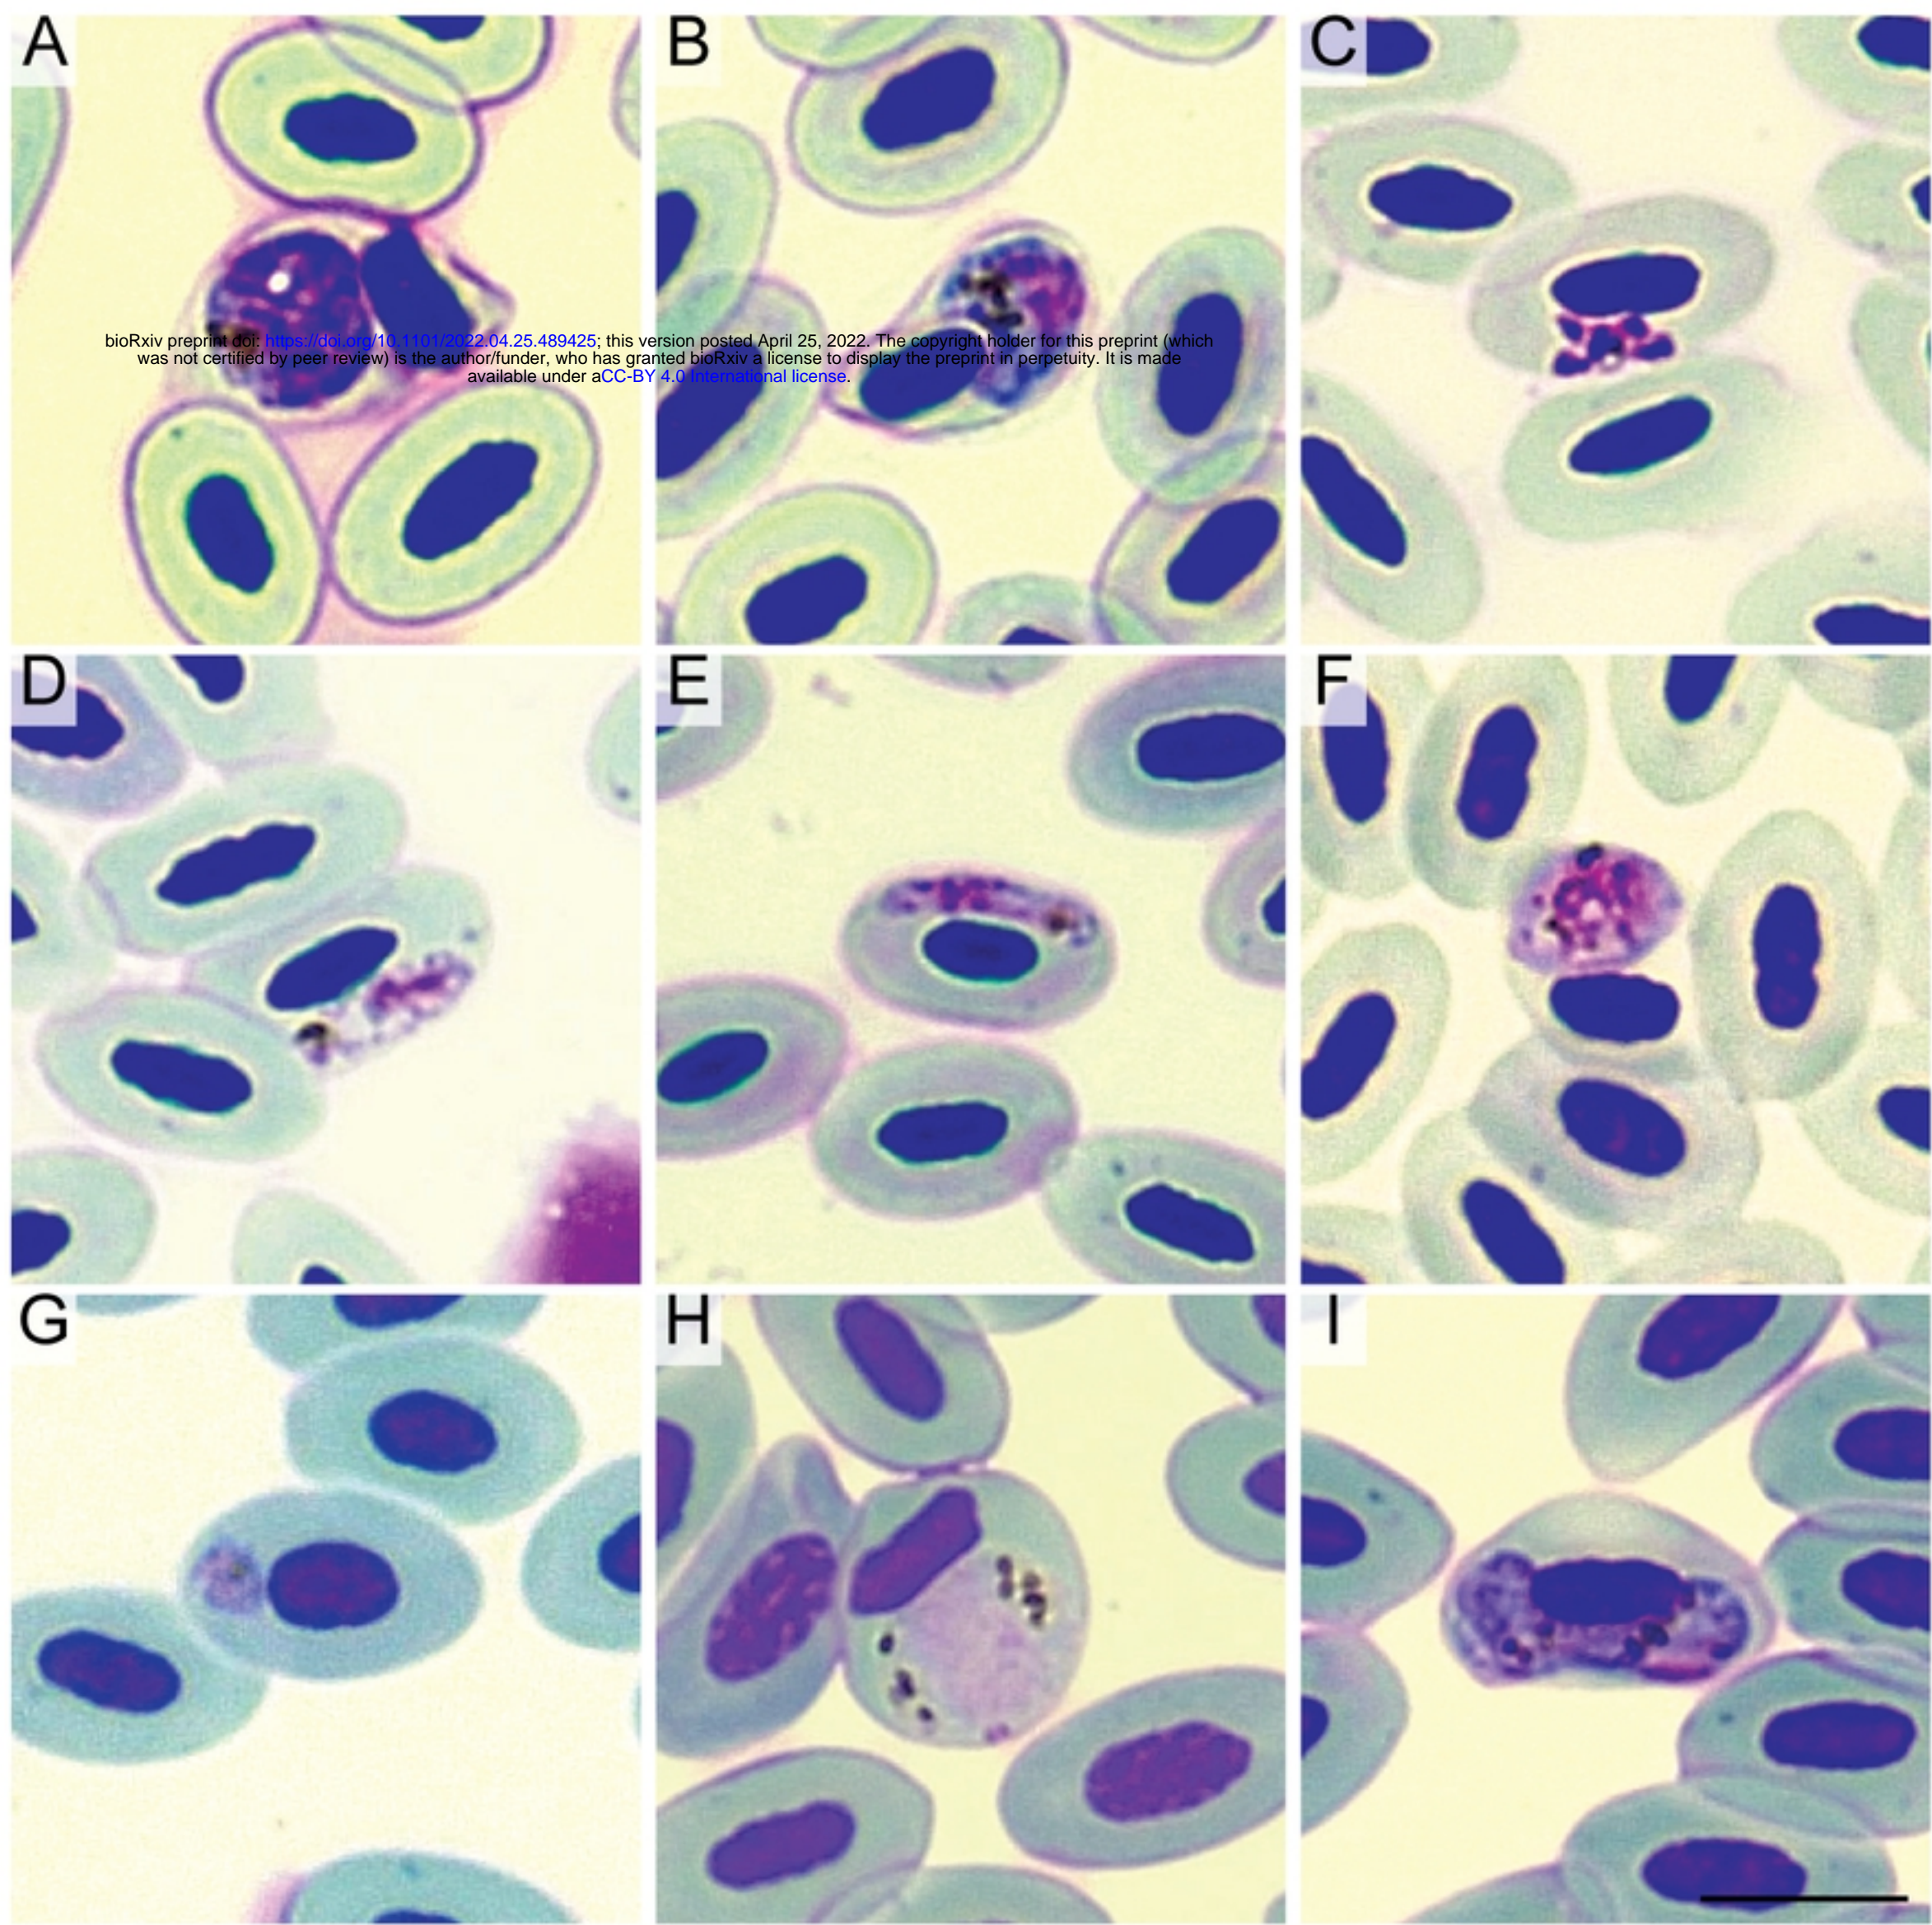

Figure 1

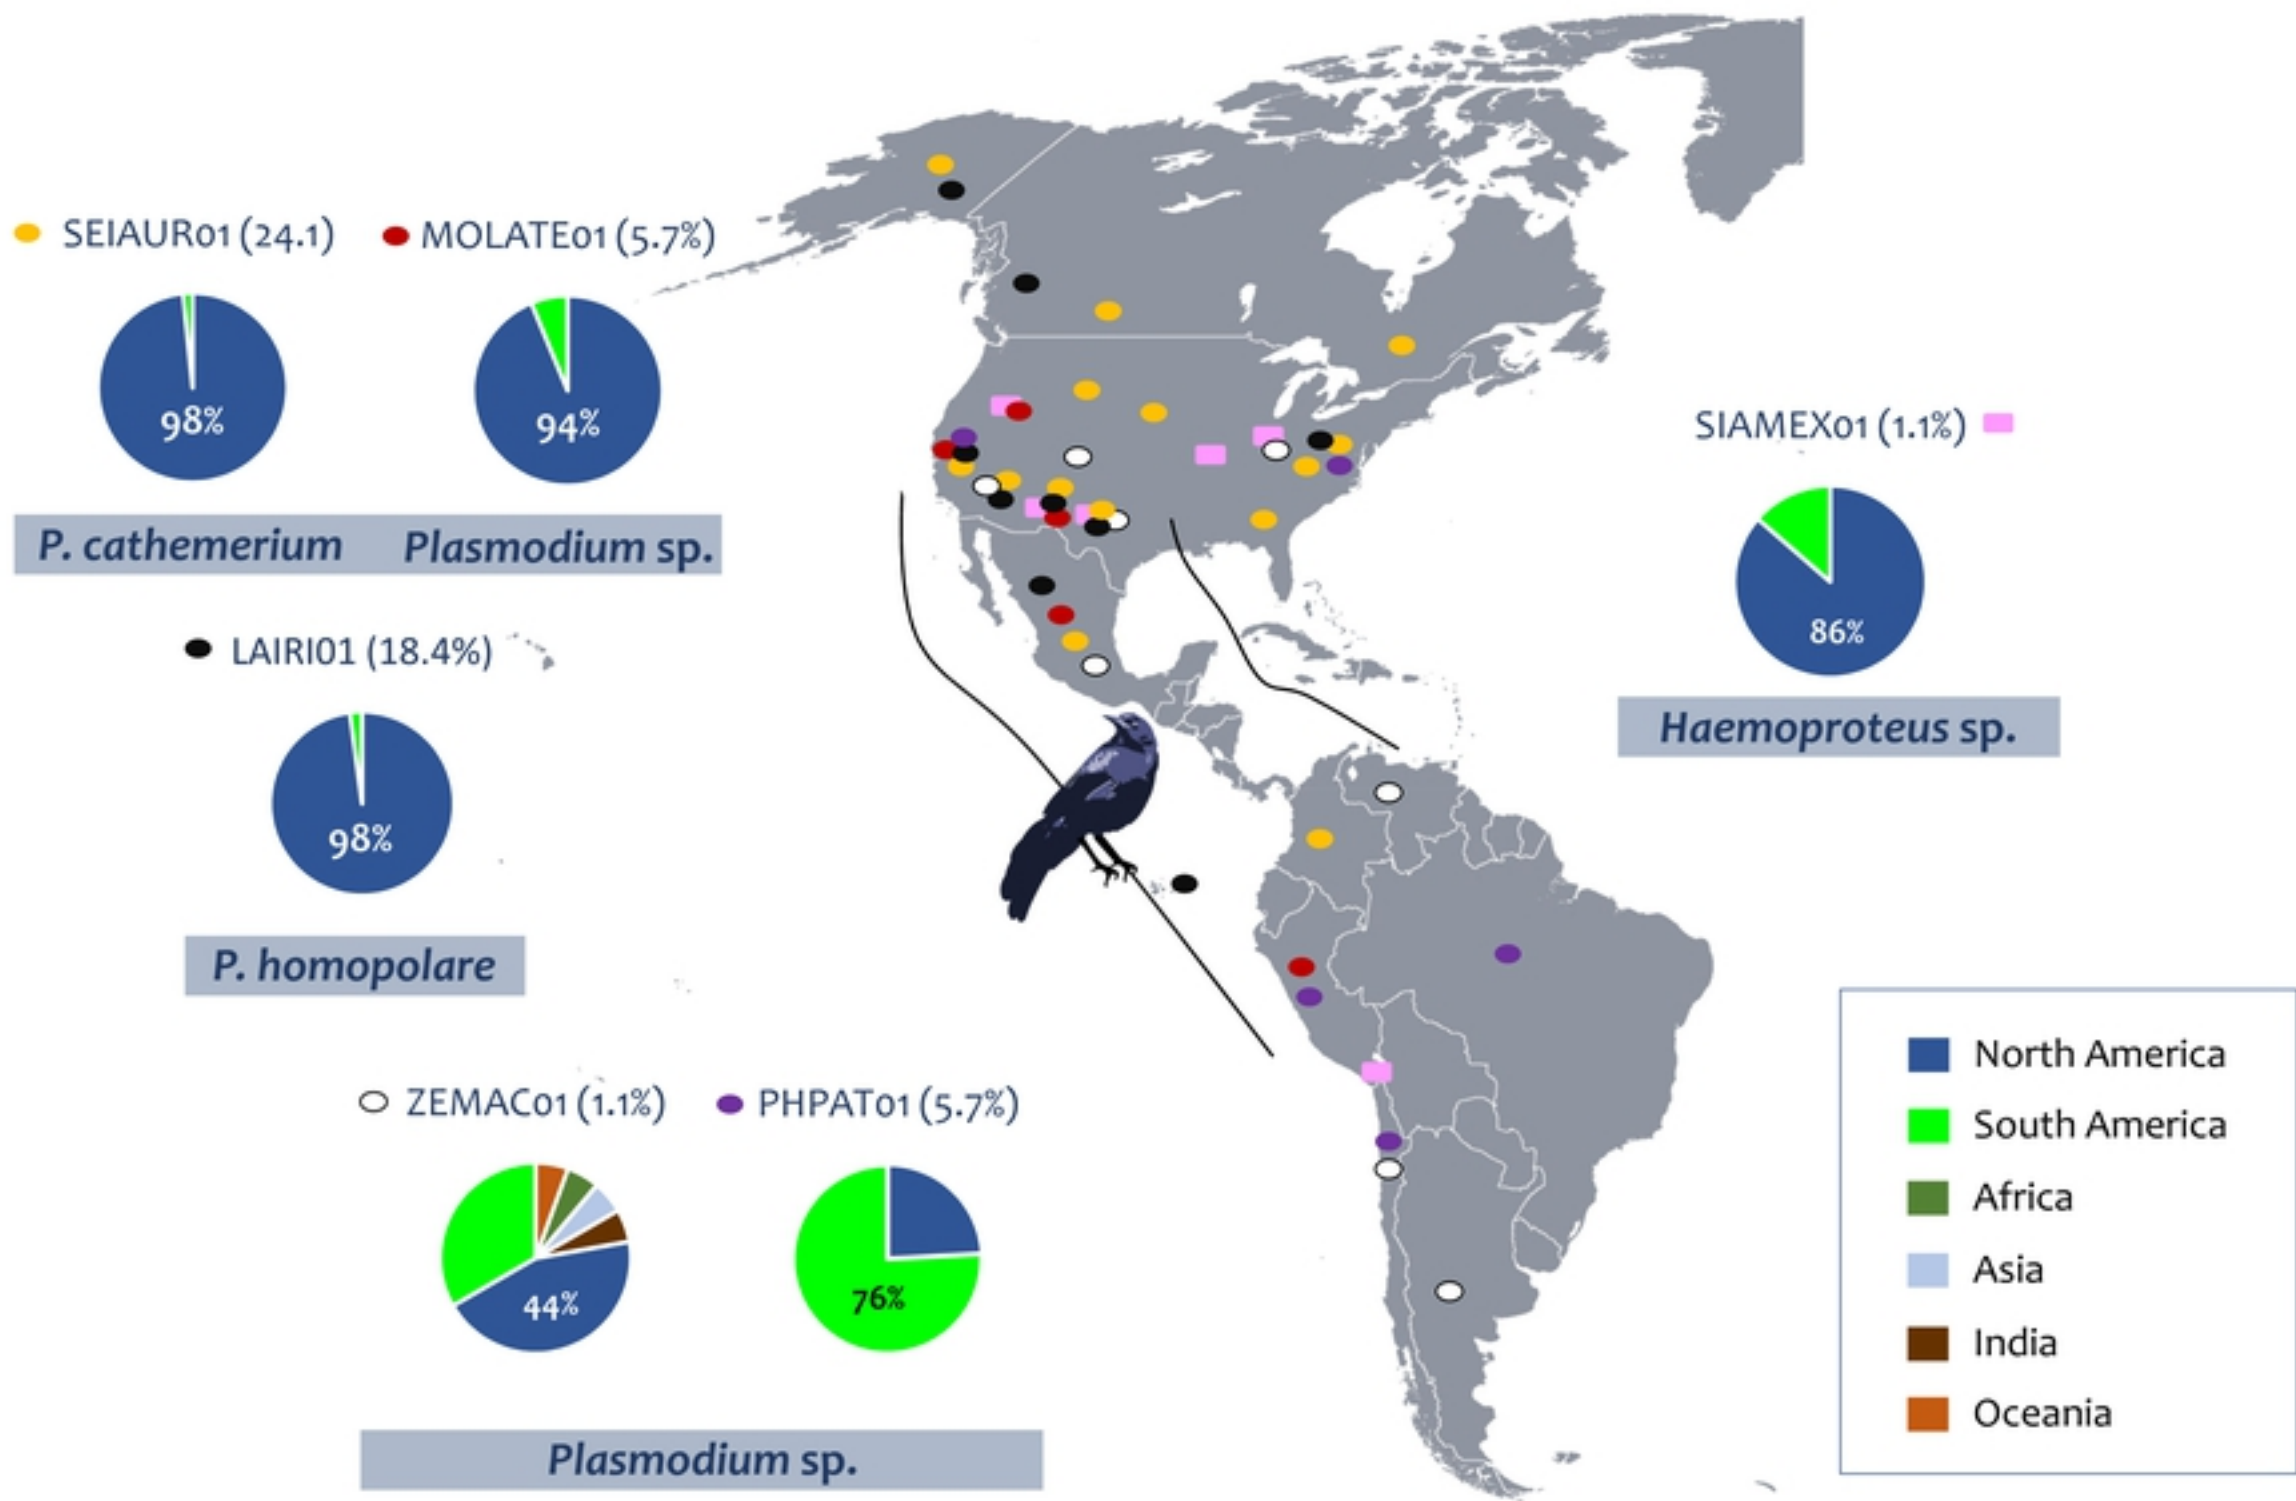

Figure 2

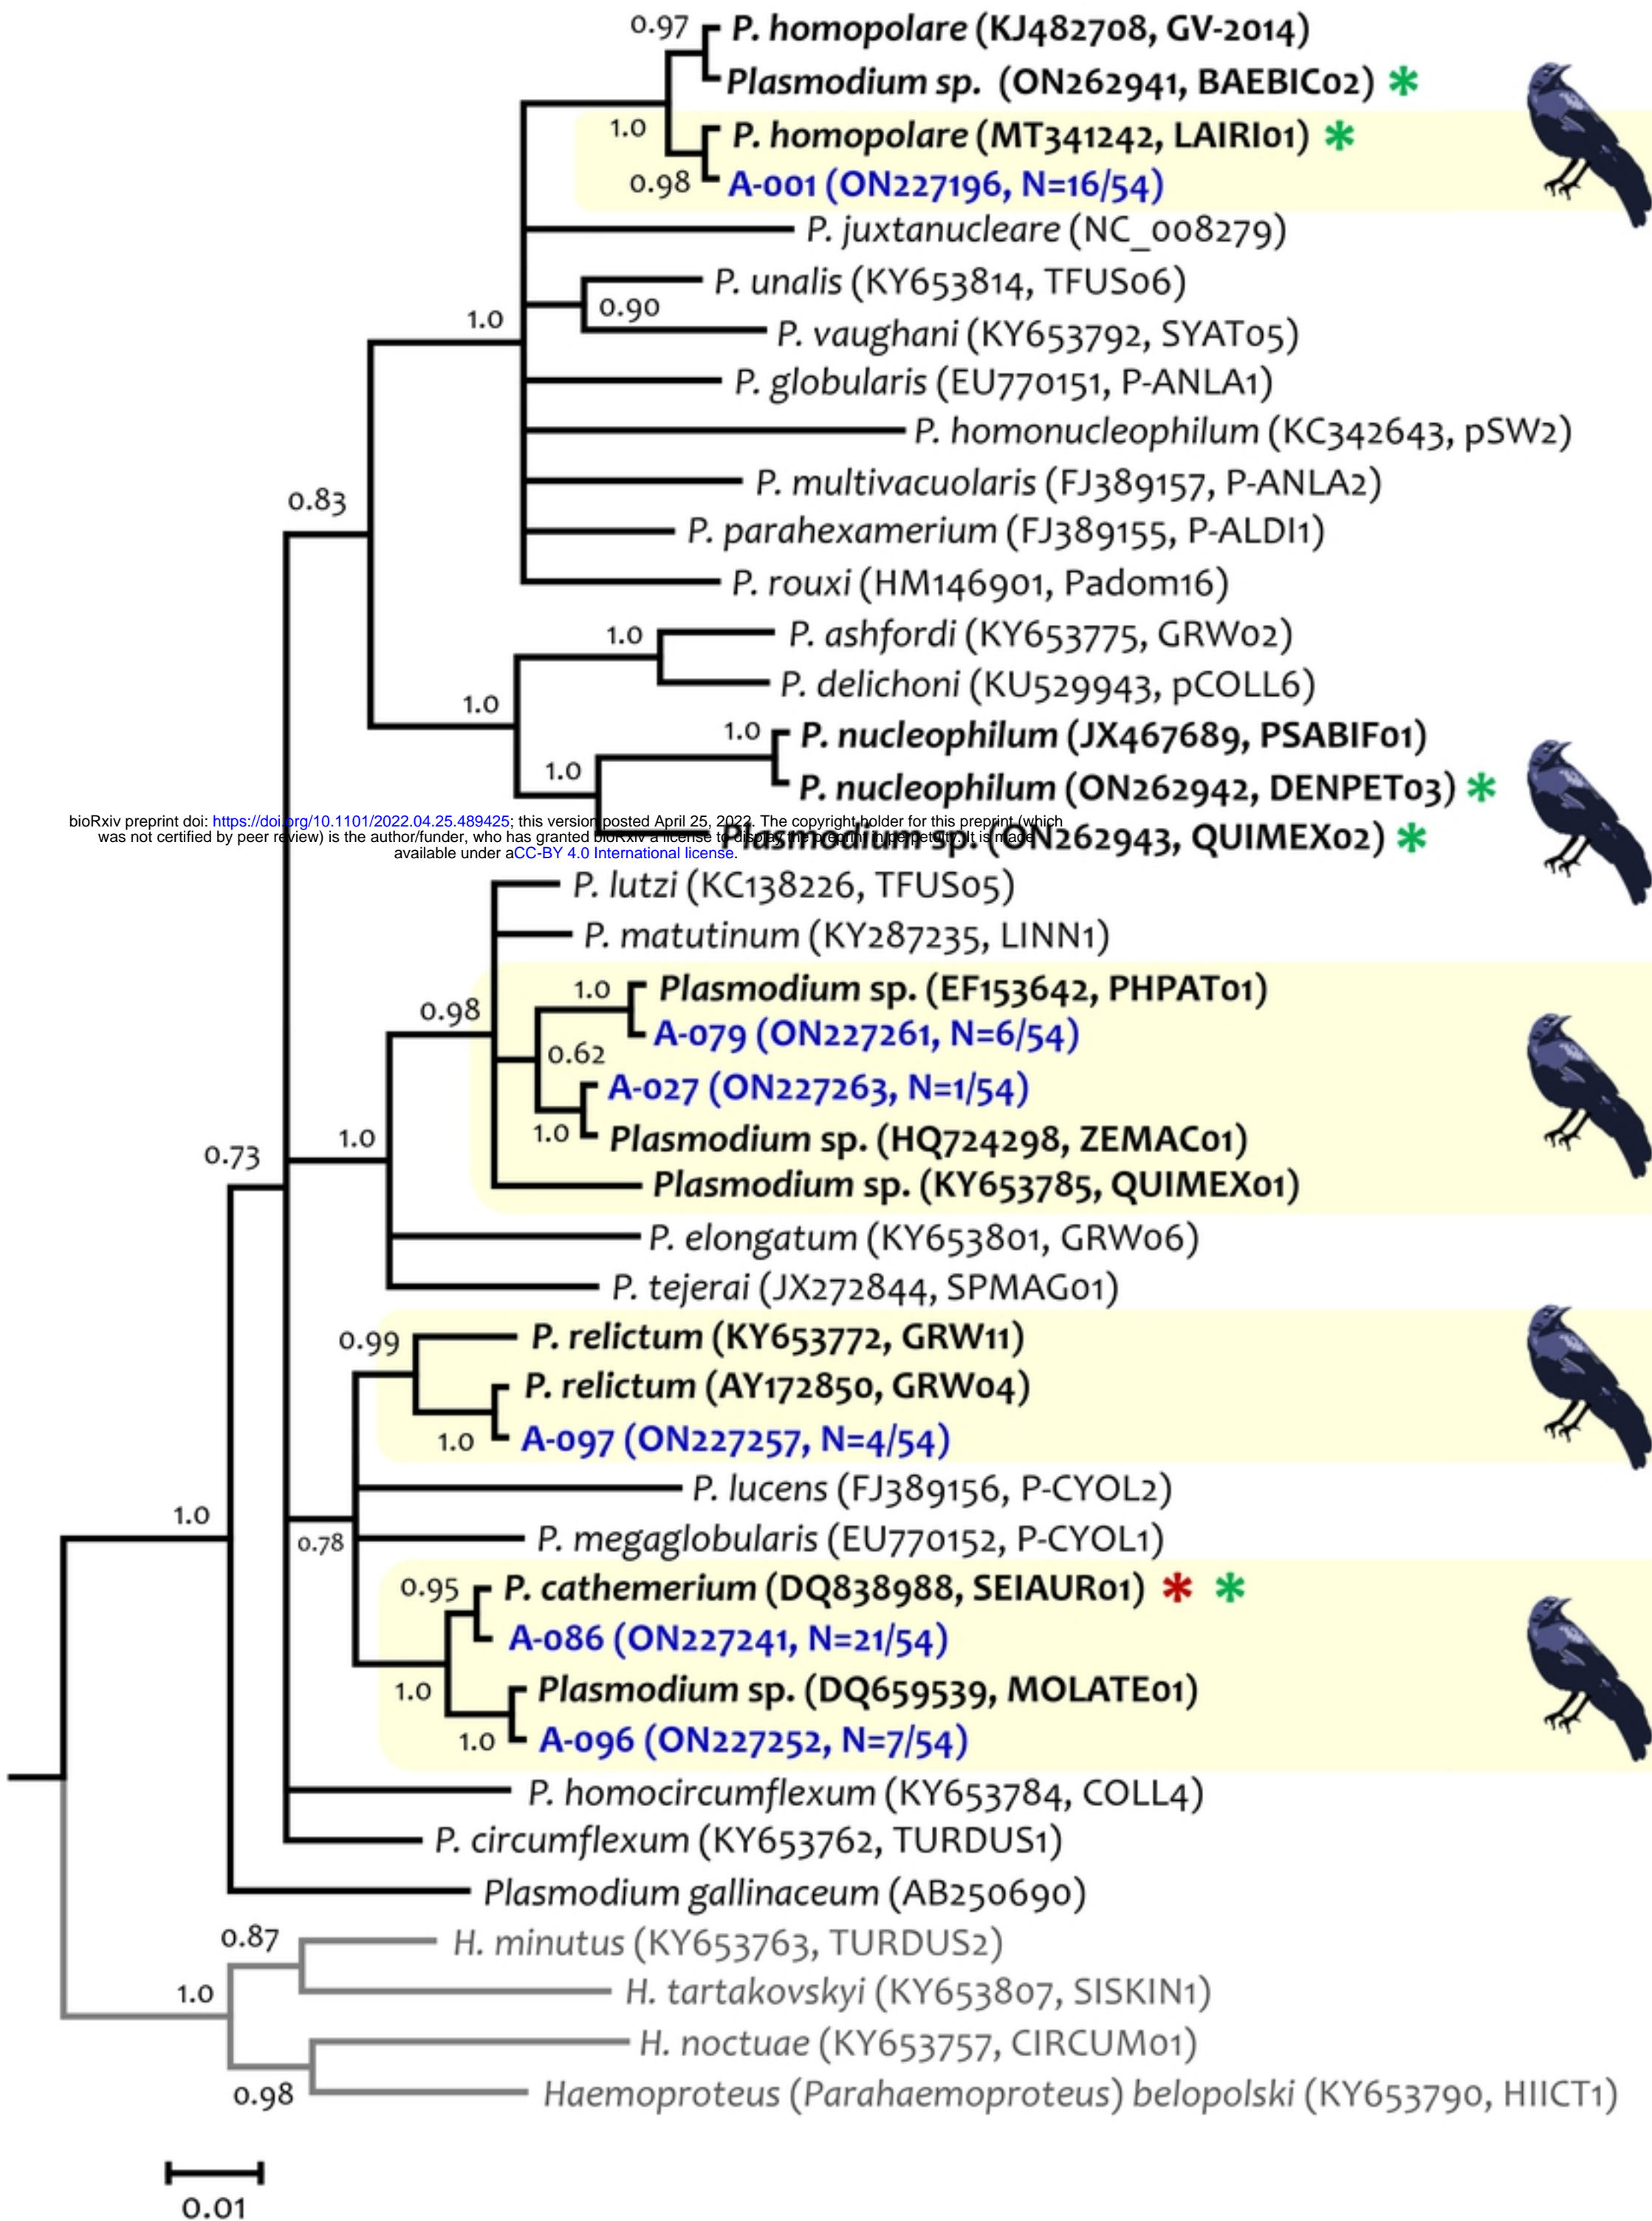

Figure 3



bioRxiv preprint doi: <https://doi.org/10.1101/2022.04.25.489425>; this version posted April 25, 2022. The copyright holder for this preprint (which was not certified by peer review) is the author/funder, who has granted bioRxiv a license to display the preprint in perpetuity. It is made available under aCC-BY 4.0 International license.

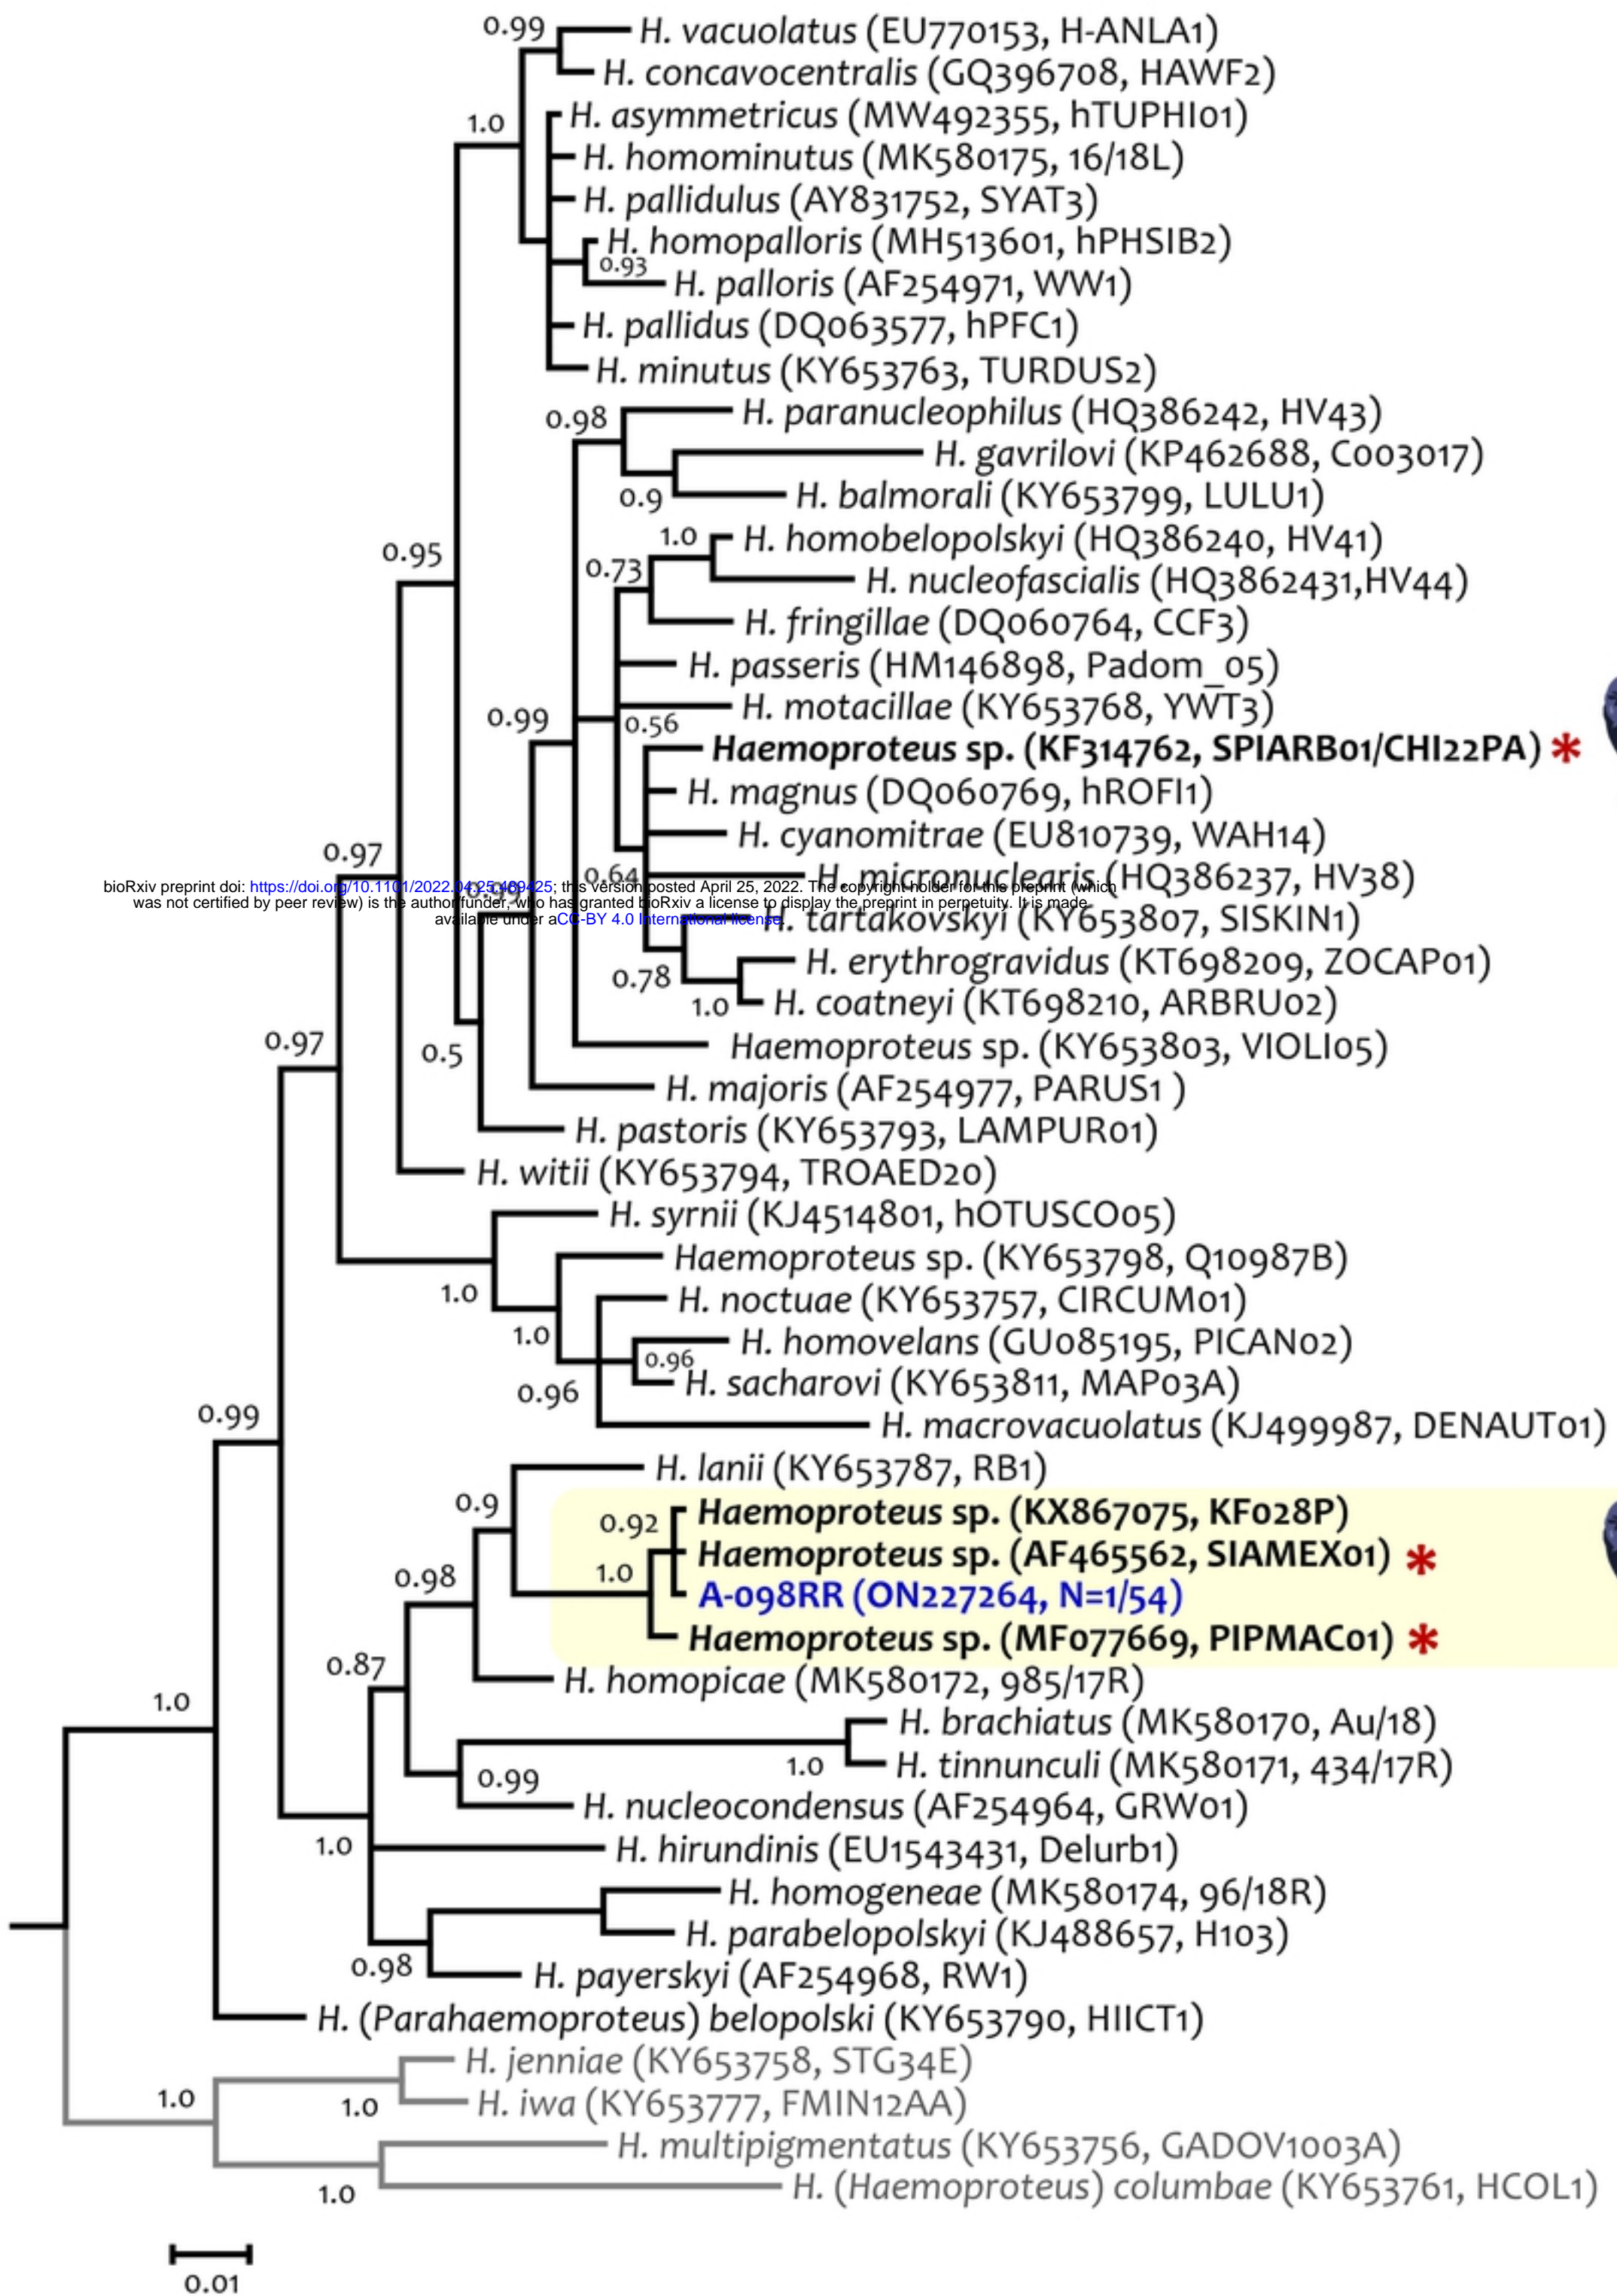

Figure 4
